# Supplementary material for: Electronic structural studies of newly synthesized sterically hindered analogues of meta-benziporphodimethene and its metal complexes
Source: Royal Society of Chemistry journal article supplement (doi:10.1039/d3nj00954h), 2023-01-01
Supplement: d3nj00954h1.pdf [file d3nj00954h1.pdf]

## Supporting Information For

### Electronic structural studies of newly synthesized sterically hindered analogue of *meta*-benziporphodimethene and its metal complexes

Sachin Kumar,<sup>†a,b</sup> Deepali Ahluwalia,<sup>†a</sup> Ritika Kubba,<sup>a</sup> Arijit Bag,<sup>c</sup> Sudhir Gopalroa Warkar,<sup>a</sup> and Anil Kumar<sup>a,\*</sup>

<sup>a</sup>*Department of Applied Chemistry, Delhi Technological University, Delhi-110042, India*

<sup>b</sup>*Schulich Faculty of Chemistry, Technion-Israel Institute of Technology, Haifa 32000, Israel*

<sup>c</sup>*Applied Sciences Department, Maulana Abul Kalam Azad University of Technology, West Bengal, India.*

| Figure       | Topic                                                                                                                                                                                                                              |
|--------------|------------------------------------------------------------------------------------------------------------------------------------------------------------------------------------------------------------------------------------|
| S1.          | <sup>1</sup> H-NMR of diol precursor (1)                                                                                                                                                                                           |
| S2.          | <sup>1</sup> H-NMR of free base BPDM (2)                                                                                                                                                                                           |
| S3.          | <sup>1</sup> H-NMR of Zn- <i>m</i> -BPDM (3)                                                                                                                                                                                       |
| S4.          | <sup>1</sup> H-NMR of Cd- <i>m</i> -BPDM (4)                                                                                                                                                                                       |
| S5.          | HRMS of free base BPDM (2) in APCI positive mode                                                                                                                                                                                   |
| S6a.         | HRMS of Zn-BPDM (3) in APCI positive mode.                                                                                                                                                                                         |
| S6b.         | MS of ZnCl-BPDM (3) in APCI positive mode.                                                                                                                                                                                         |
| S7a.         | HRMS of Cd-BPDM (4) in APCI positive mode.                                                                                                                                                                                         |
| S7b.         | MS of CdCl-BPDM (4) in APCI positive mode.                                                                                                                                                                                         |
| S8.          | Fluorescence behavior of chlorozinc(II) 11,16-Bis(phenyl)-6,6,21,21-tetraphenyl- <i>meta</i> -benzi-6,21-porphoodimethene (3) in toluene solution upon excitation at 697 nm.                                                       |
| <b>Chart</b> |                                                                                                                                                                                                                                    |
| S9           | B3LYP/LANL2DZ optimized geometries for (a) Zinc syn conformer ; (b) Zinc anti conformer; (c) Cd syn conformer; (d) Cd anti conformer; when R"= H. at <i>sp</i> <sup>3</sup> meso carbons.                                          |
| S10          | B3LYP/LANL2DZ optimized geometries for (a) Zinc <i>syn</i> conformer; (b) Zinc <i>anti</i> conformer; (c) Cd <i>syn</i> conformer (d) Cd <i>anti</i> conformer; when R"= CH <sub>3</sub> , at <i>sp</i> <sup>3</sup> meso carbons. |
| S11          | B3LYP/LANL2DZ optimized geometries for (a) Zinc syn conformer ; (b) Zinc anti conformer; (c) Cd syn conformer; (d) Cd anti conformer; when R"= Ph at <i>sp</i> <sup>3</sup> meso carbons.                                          |
| S12          | B3LYP/LANL2DZ optimized geometries for free base <i>m</i> -BPDM when (a) R"= H; (b) R"= methyl; (c) R" = Phenyl at <i>sp</i> <sup>3</sup> meso carbons.                                                                            |
| S13          | X-Ray geometries for (a') Zinc syn conformer; (c') Cd syn conformer ; when R"= CH <sub>3</sub> , at <i>sp</i> <sup>3</sup> meso carbons.                                                                                           |
| <b>Table</b> |                                                                                                                                                                                                                                    |

|     |                                                                                              |
|-----|----------------------------------------------------------------------------------------------|
| S14 | Xyz-Coordinates of optimized geometry of compound 2 viz., free base m-BPDM, R"=Ph            |
| S15 | Xyz-Coordinates of optimized geometry of compound 3                                          |
| S16 | Xyz-Coordinates of optimized geometry of compound 4                                          |
| S17 | Xyz-Coordinates of optimized geometry of free base m-BPDM R"=H                               |
| S18 | Xyz-Coordinates of optimized geometry of free base m-BPDM R"=CH <sub>3</sub>                 |
| S19 | Xyz-Coordinates of optimized geometry of syn conformer of Zn(II) m-BPDM, R"=H                |
| S20 | Xyz-Coordinates of optimized geometry of anti-conformer of Zn(II) m-BPDM, R"=H               |
| S21 | Xyz-Coordinates of optimized geometry of syn conformer of Cd(II) m-BPDM, R"=H                |
| S22 | Xyz-Coordinates of optimized geometry of anti-conformer of Cd(II) m-BPDM, R"=H               |
| S23 | Xyz-Coordinates of optimized geometry of syn conformer of Zn(II) m-BPDM, R"=CH <sub>3</sub>  |
| S24 | Xyz-Coordinates of optimized geometry of anti-conformer of Zn(II) m-BPDM, R"=CH <sub>3</sub> |
| S25 | Xyz-Coordinates of optimized geometry of syn conformer of Cd(II) m-BPDM, R"=CH <sub>3</sub>  |
| S26 | Xyz-Coordinates of optimized geometry of anti-conformer of Cd(II) m-BPDM, R"=CH <sub>3</sub> |
| S27 | Xyz-Coordinates of optimized geometry of syn conformer of Zn(II) m-BPDM, R"=Ph               |
| S28 | Xyz-Coordinates of optimized geometry of anti-conformer of Zn(II) m-BPDM, R"=Ph              |
| S29 | Xyz-Coordinates of optimized geometry of syn conformer of Cd(II) m-BPDM, R"=Ph               |
| S30 | Xyz-Coordinates of optimized geometry of anti-conformer of Cd(II) m-BPDM, R"=Ph              |

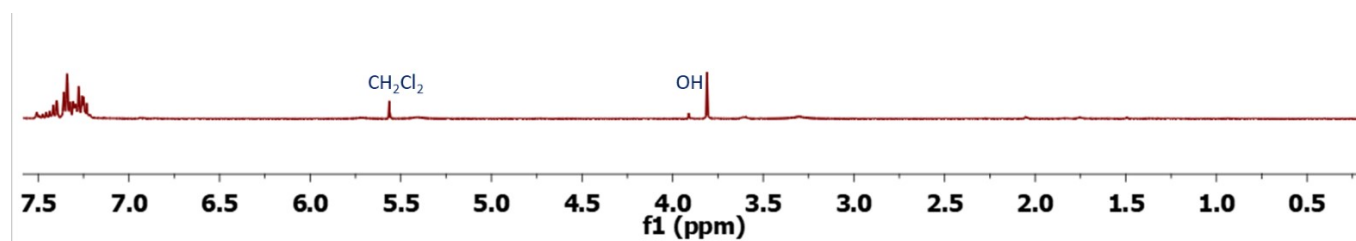

Figure S1. <sup>1</sup>H-NMR of 1,3-Bis(diphenylhydroxymethyl)benzene (1) precursor in CD<sub>3</sub>COCD<sub>3</sub>.

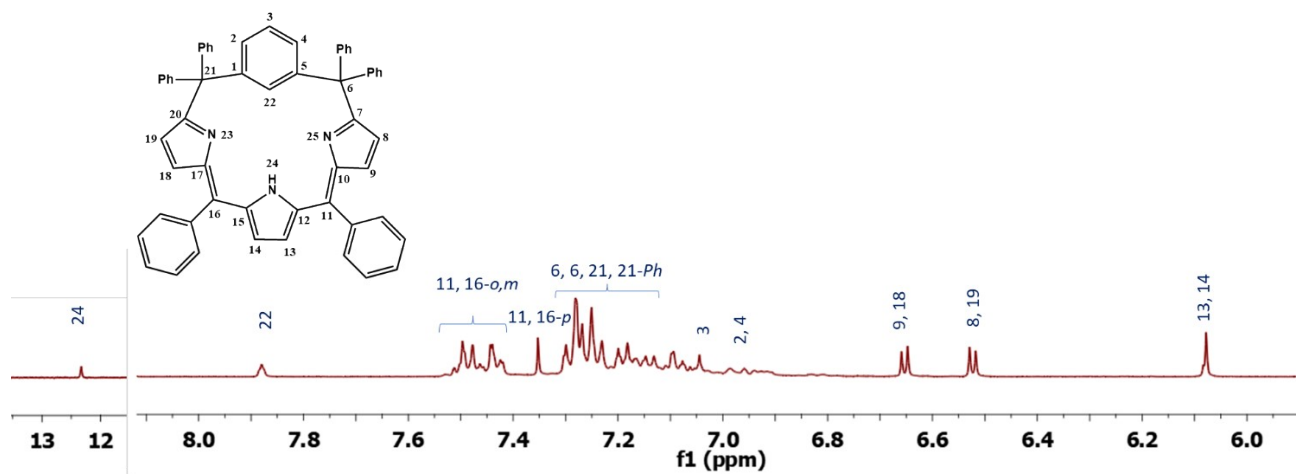

Figure S2. <sup>1</sup>H-NMR of 11,16-Bis(phenyl)-6,6,21,21-tetraphenyl-*meta*-benzi-6,21-porphoodimethene (2) in CD<sub>3</sub>COCD<sub>3</sub>.

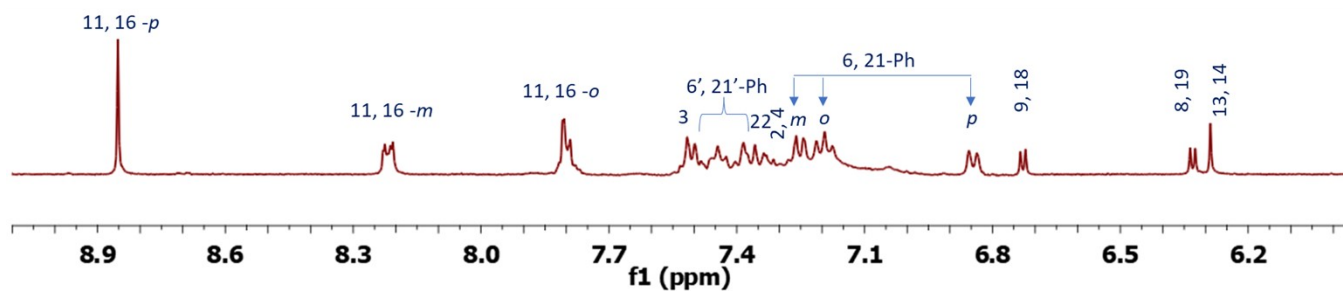

**Figure S3.**  $^1\text{H}$ -NMR of chlorozinc(II) 11,16-Bis(phenyl)-6,6,21,21-tetraphenyl-*meta*-benzi-6,21-porphoodimethene (**3**) in  $\text{CD}_3\text{COCD}_3$ .

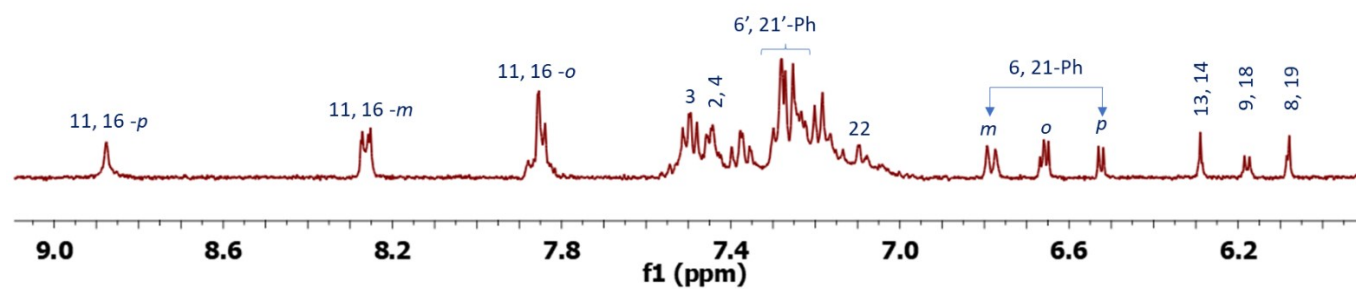

**Figure S4.**  $^1\text{H}$ -NMR of chlorocadmium(II) 11,16-Bis(phenyl)-6,6,21,21-tetraphenyl-*meta*-benzi-6,21-porphoodimethene (**4**) in  $\text{CD}_3\text{COCD}_3$ .

## Compound Spectrum SmartFormula Report

### Analysis Info

Analysis Name D:\Data\Gross\Gr\_2509000001.d  
 Method APCI\_pos\_SolidProbe.m  
 Sample Name BPDM  
 Comment

Acquisition Date 06/02/2022 16:50:33

Operator Larisa Panz  
 Instrument maXis impact 282001.00128

### Acquisition Parameter

|             |          |                      |          |                  |           |
|-------------|----------|----------------------|----------|------------------|-----------|
| Source Type | APCI     | Ion Polarity         | Negative | Set Nebulizer    | 1.2 Bar   |
| Focus       | Active   | Set Capillary        | 4000 V   | Set Dry Heater   | 120 °C    |
| Scan Begin  | 50 m/z   | Set End Plate Offset | -500 V   | Set Dry Gas      | 1.5 l/min |
| Scan End    | 2000 m/z | Set Charging Voltage | 2000 V   | Set Divert Valve | Source    |
|             |          | Set Corona           | 2000 nA  | Set APCI Heater  | 200 °C    |

### -MS, 1.8-2.1min #110-128

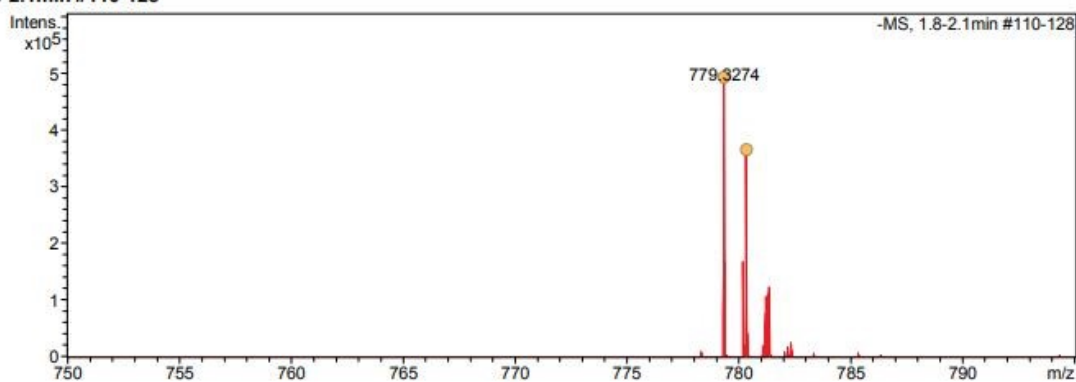

| Meas. m/z | # | Ion Formula | m/z      | err [ppm] | mSigma | # mSigma | Score  | rdb  | e <sup>-</sup> Conf | N-Rule | err  [mDa] |
|-----------|---|-------------|----------|-----------|--------|----------|--------|------|---------------------|--------|------------|
| 779.3274  | 1 | C58H42N3    | 780.3379 | 2580.6    | 818.5  | 1        | -1.#J  | 39.5 | even                | ok     | 2013.8     |
|           | 1 | C58H41N3    | 779.3306 | 4.1       | 54.1   | 1        | 100.00 | 40.0 | odd                 | ok     | 3.2        |
|           | 1 | C58H42N3    | 780.3379 | 1.5       | 818.5  | 1        | 100.00 | 39.5 | even                | ok     | 1.5        |
| 780.3320  | 1 | C58H42N3    | 780.3384 | 8.2       | 160.9  | 1        | 100.00 | 39.5 | even                | ok     | 6.4        |
|           | 1 | C58H42N3    | 780.3384 | 8.2       | 160.9  | 1        | 100.00 | 39.5 | even                | ok     | 6.4        |

**Figure S5.** HRMS of **11,16-Bis(phenyl)-6,6,21,21-tetraphenyl-*meta*-benzi-6,21-porphoodimethene (2)** in APCI positive mode.

**Analysis Info**

Analysis Name D:\Data\Gross\Gr\_2510000004.d  
Method APCI\_pos\_SolidProbe.m  
Sample Name Zn BPDM  
Comment

Acquisition Date 06/02/2022 17:39:50

Operator Larisa Panz  
Instrument maXis impact 282001.00128

**Acquisition Parameter**

|             |          |                      |          |                  |           |
|-------------|----------|----------------------|----------|------------------|-----------|
| Source Type | APCI     | Ion Polarity         | Positive | Set Nebulizer    | 1.2 Bar   |
| Focus       | Active   | Set Capillary        | 3000 V   | Set Dry Heater   | 120 °C    |
| Scan Begin  | 50 m/z   | Set End Plate Offset | -500 V   | Set Dry Gas      | 1.5 l/min |
| Scan End    | 2000 m/z | Set Charging Voltage | 2000 V   | Set Divert Valve | Source    |
|             |          | Set Corona           | 5000 nA  | Set APCI Heater  | 200 °C    |

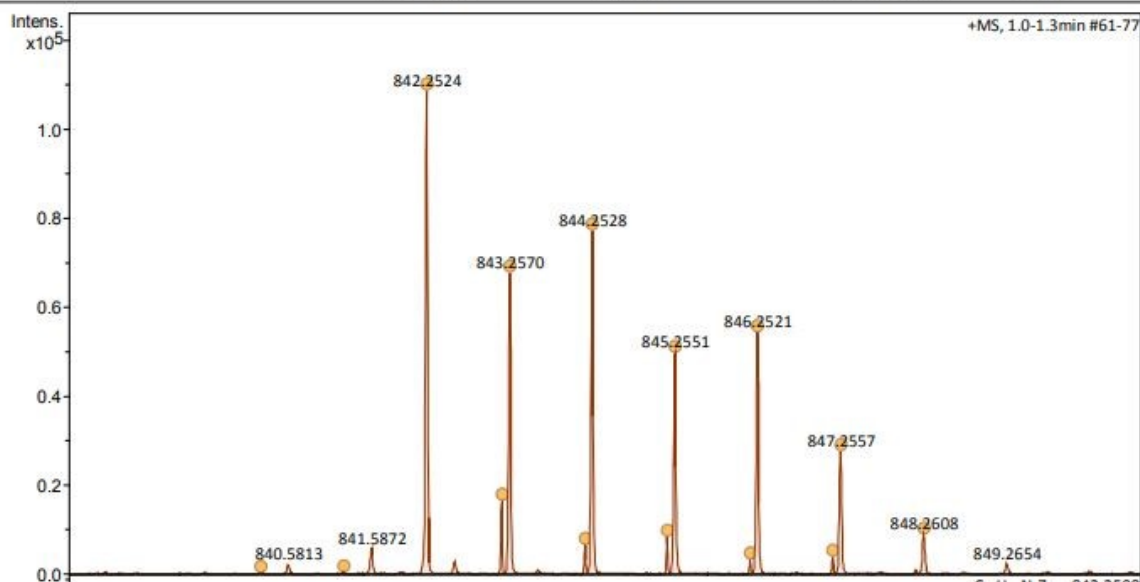

**Figure S6a.** HRMS of Zn(II) 11,16-Bis(phenyl)-6,6,21,21-tetraphenyl-*meta*-benzi-6,21-porphoodimethene (**3**) in APCI positive mode.

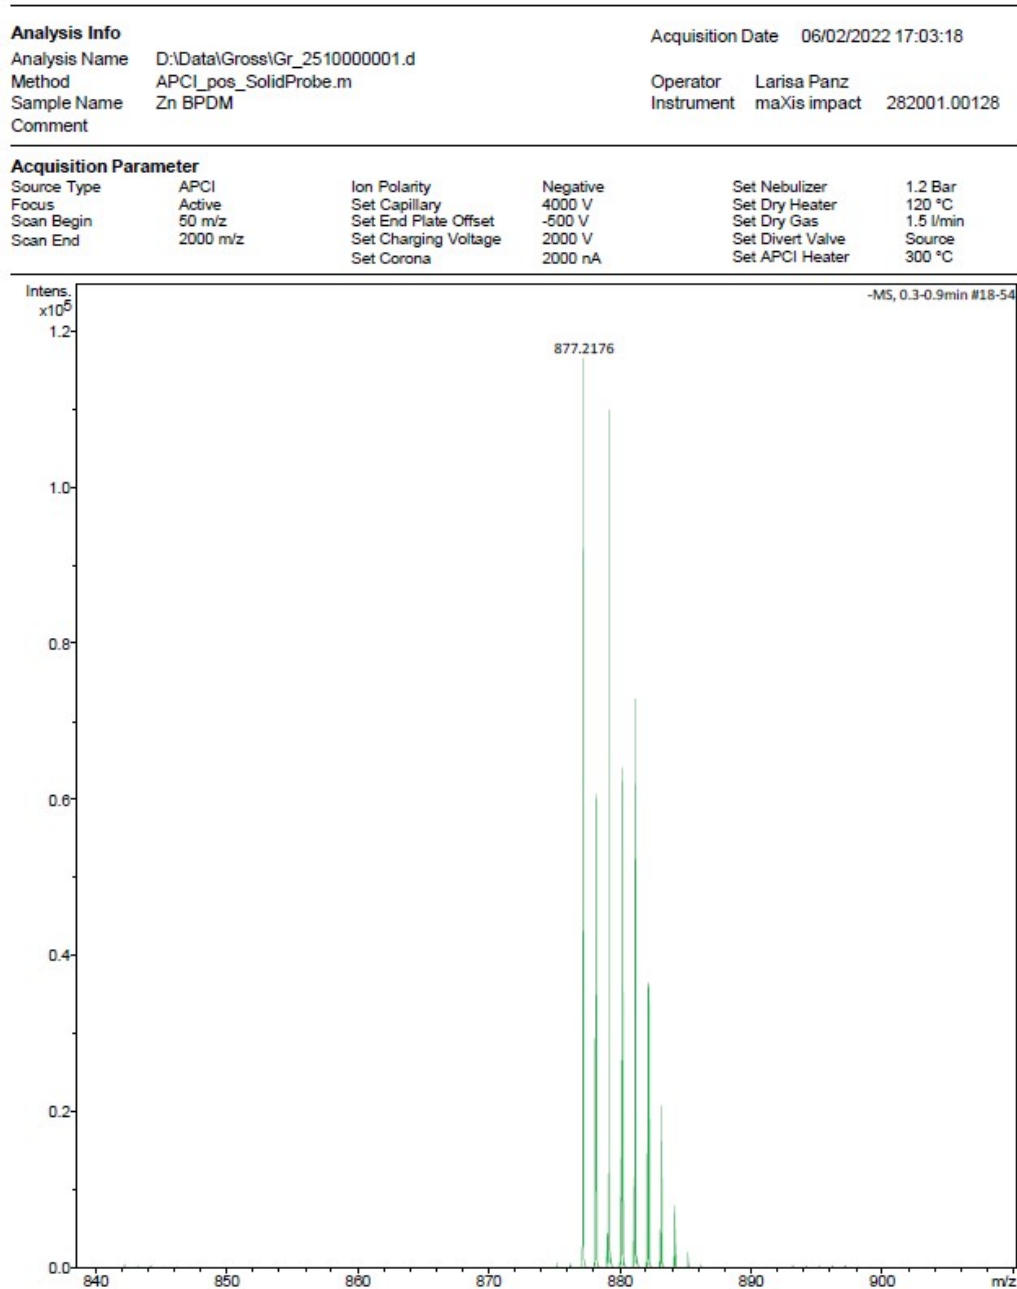

**Figure S6b.** MS of chlorozinc(II) 11,16-Bis(phenyl)-6,6,21,21-tetraphenyl-*meta*-benzi-6,21-porphoodimethene (3) in APCI positive mode.

## Generic Display Report

### Analysis Info

Analysis Name D:\Data\Gross\Gr\_2512000002.d  
Method APCI\_pos\_SolidProbe.m  
Sample Name Cd BPDM  
Comment

Acquisition Date 08/02/2022 10:53:50

Operator Larisa Panz  
Instrument maXis impact

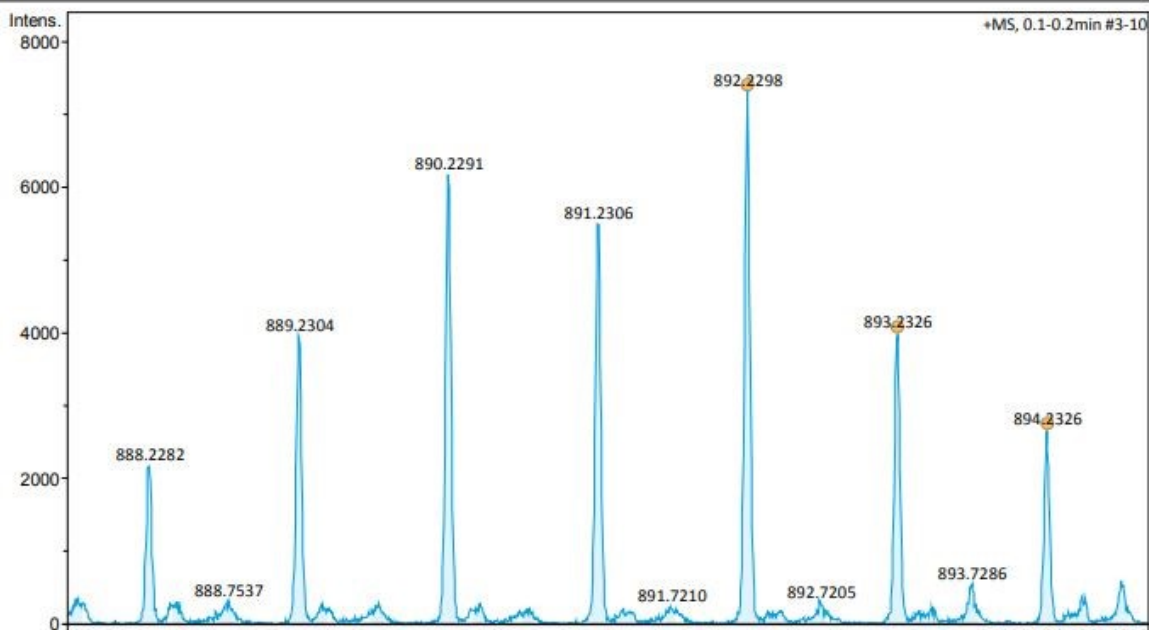

**Figure S7a.** HRMS of cadmium(II) 11,16-Bis(phenyl)-6,6,21,21-tetraphenyl-*meta*-benzi-6,21-porphoodimethene (4) in APCI positive mode.

## Display Report

### Analysis Info

Analysis Name D:\Data\Gross\Gr\_4549000003.d  
Method APCI\_pos\_SolidProbe.m  
Sample Name BPDM CdCl  
Comment

Acquisition Date 25/06/2023 17:29:13  
Operator Larisa Panz  
Instrument maXis impact 282001.00128

### Acquisition Parameter

|             |          |                      |          |                  |           |
|-------------|----------|----------------------|----------|------------------|-----------|
| Source Type | APCI     | Ion Polarity         | Negative | Set Nebulizer    | 1.2 Bar   |
| Focus       | Active   | Set Capillary        | 4000 V   | Set Dry Heater   | 250 °C    |
| Scan Begin  | 50 m/z   | Set End Plate Offset | -500 V   | Set Dry Gas      | 1.5 l/min |
| Scan End    | 2000 m/z | Set Charging Voltage | 2000 V   | Set Divert Valve | Source    |
|             |          | Set Corona           | 2000 nA  | Set APCI Heater  | 330 °C    |

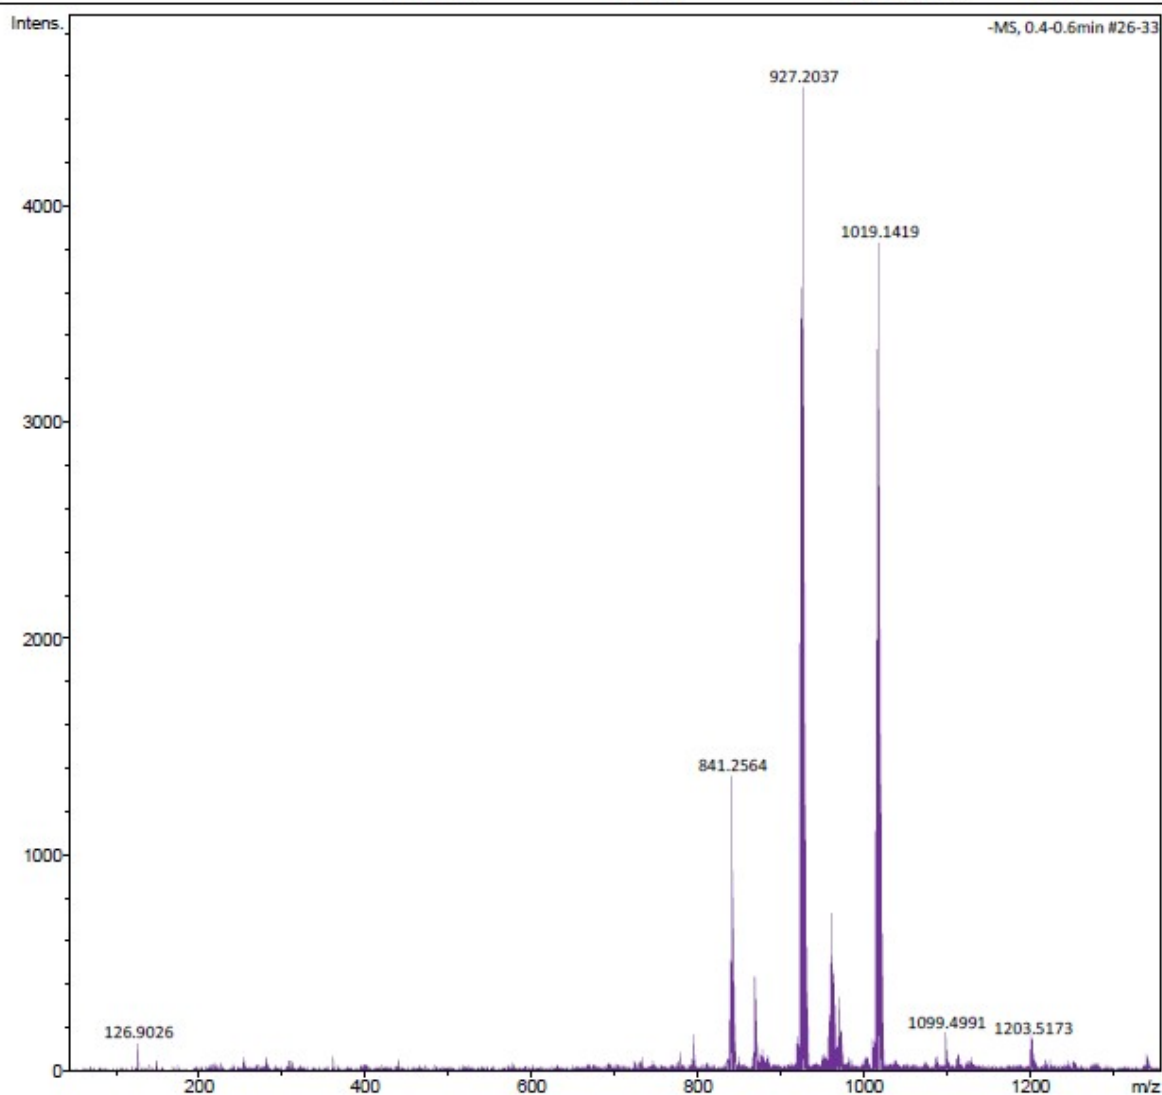

**Figure S7b.** MS of chlorocadmium(II) 11,16-Bis(phenyl)-6,6,21,21-tetraphenyl-meta-benzi-6,21-porphoodimethene (4) in APCI positive mode.

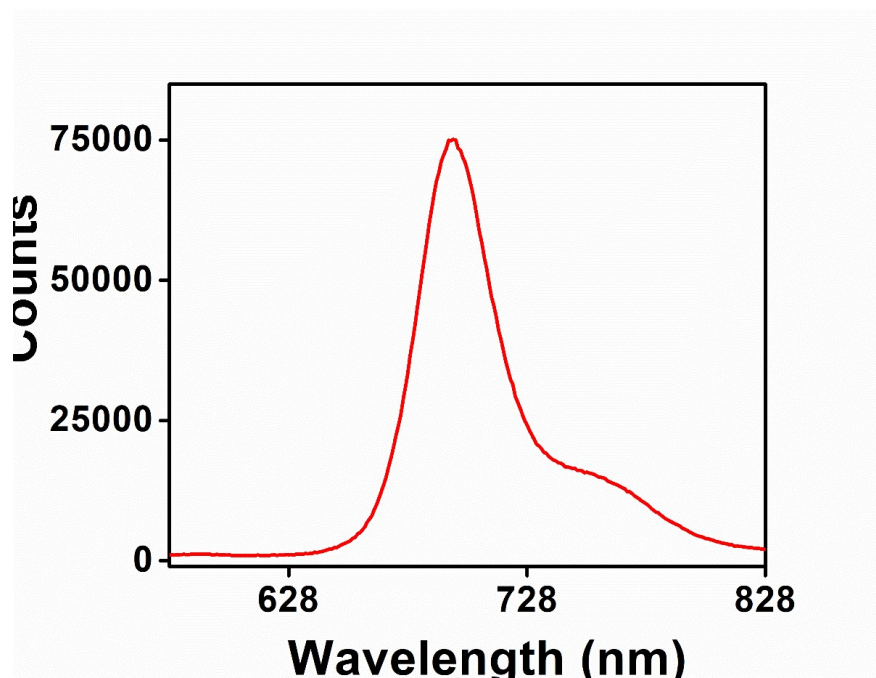

**Figure S8.** Fluorescence behavior of chlorozinc(II) 11,16-Bis(phenyl)-6,6,21,21-tetraphenyl-*meta*-benzi-6,21-porphoodimethene (3) in toluene solution upon excitation at 363 nm.

**Chart S9.** B3LYP/LANL2DZ optimized geometries for (a) Zinc syn conformer ; (b) Zinc anti conformer; (c) Cd syn conformer; (d) Cd anti conformer; when R''= H. at  $sp^3$  meso carbons.

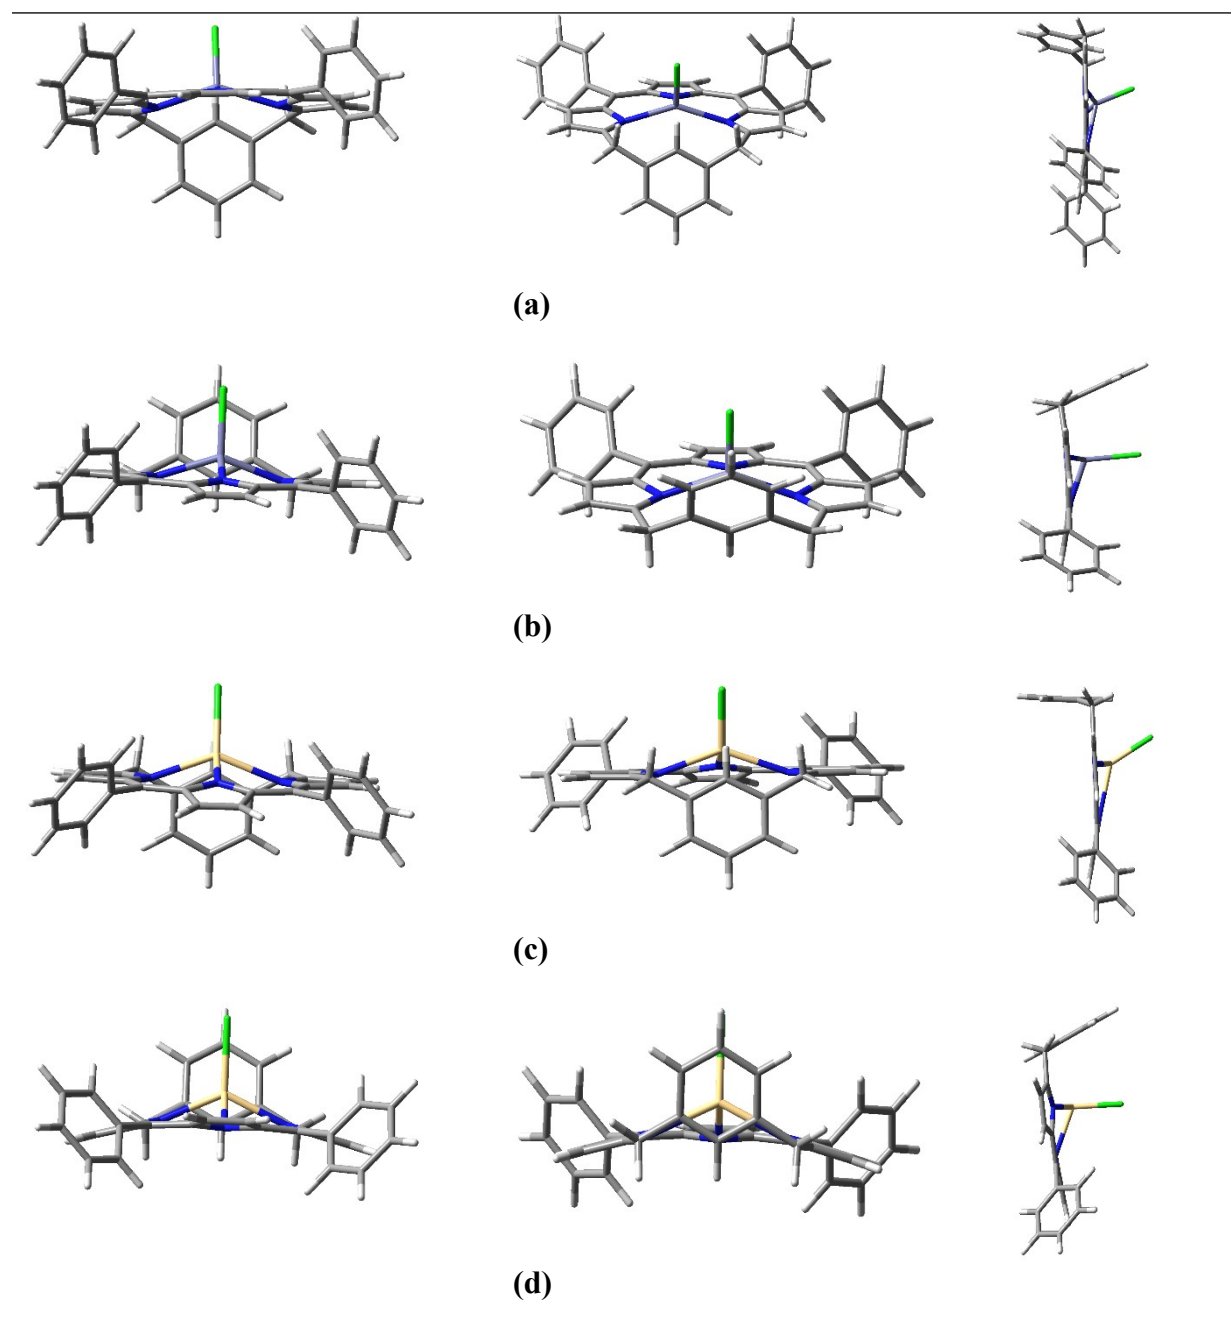

**Chart S10.** B3LYP/LANL2DZ optimized geometries for (a) Zinc *syn* conformer; (b) Zinc *anti* conformer; (c) Cd *syn* conformer (d) Cd *anti* conformer; when R''= CH<sub>3</sub>, at *sp*<sup>3</sup> meso carbons.

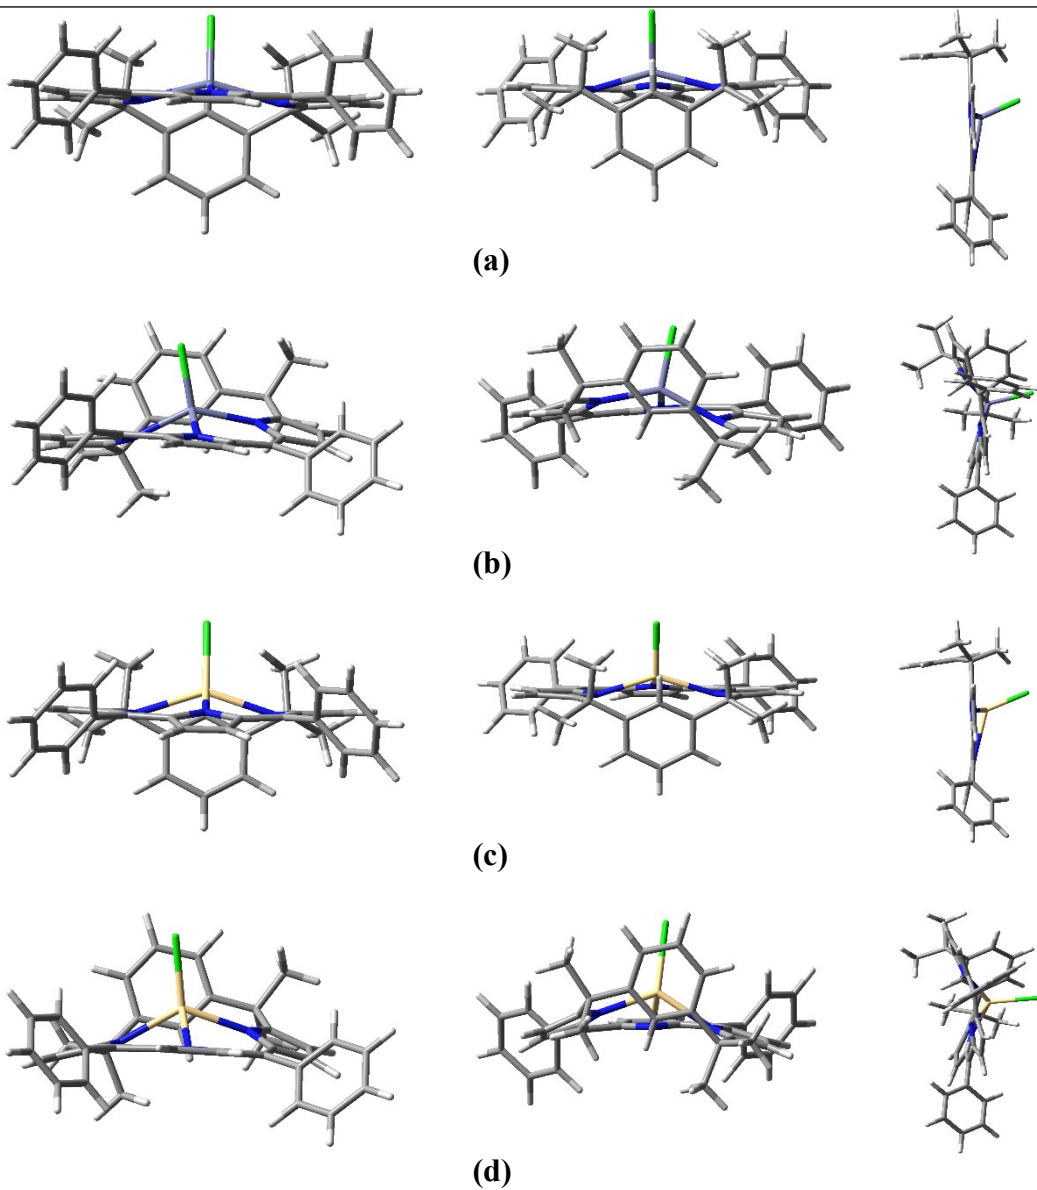

**Chart S11.** B3LYP/LANL2DZ optimized geometries for (a) Zinc syn conformer ; (b) Zinc anti conformer; (c) Cd syn conformer; (d) Cd anti conformer; when R''= Ph at  $sp^3$  meso carbons.

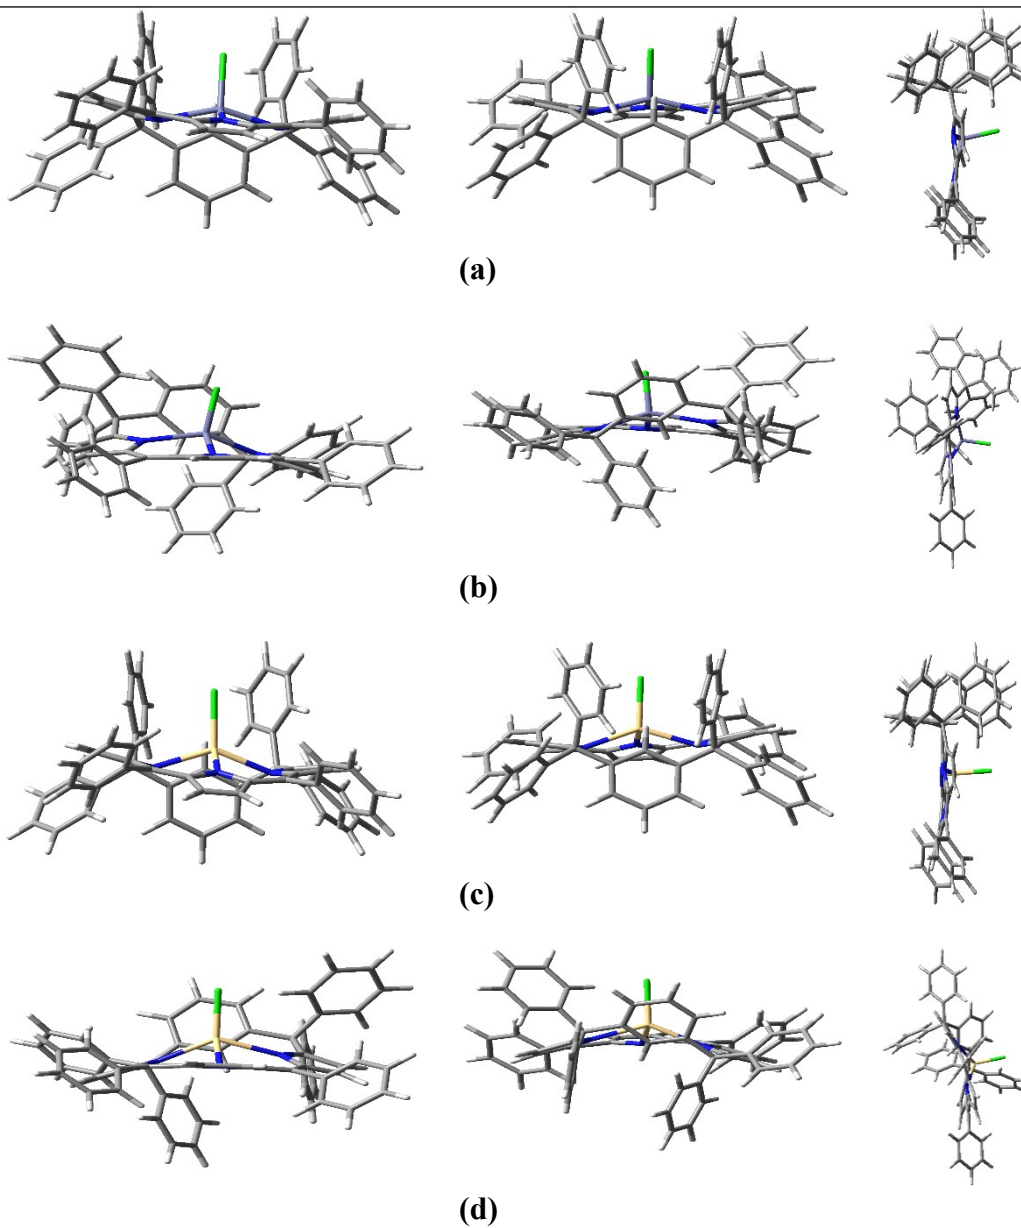

**Chart S12.** B3LYP/LANL2DZ optimized geometries for free base *m*-BPDM when (a) R''= H; (b) R''= methyl; (c) R'' = Phenyl at  $sp^3$  meso carbons.

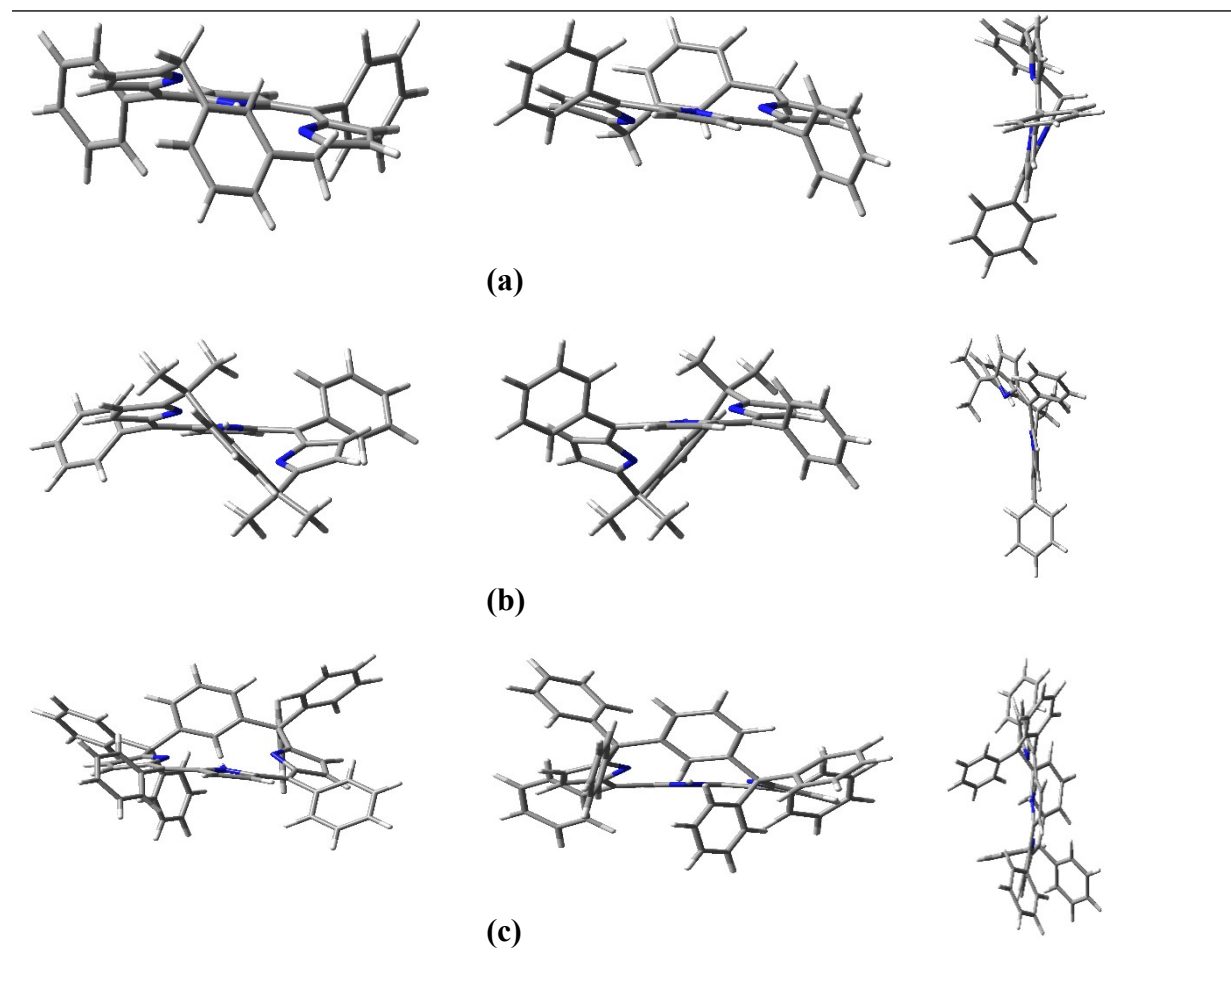

**Chart S13.** X-Ray geometries for (a') Zinc *syn* conformer; (c') Cd *syn* conformer ; when R''= CH<sub>3</sub>, at  $sp^3$  meso carbons.

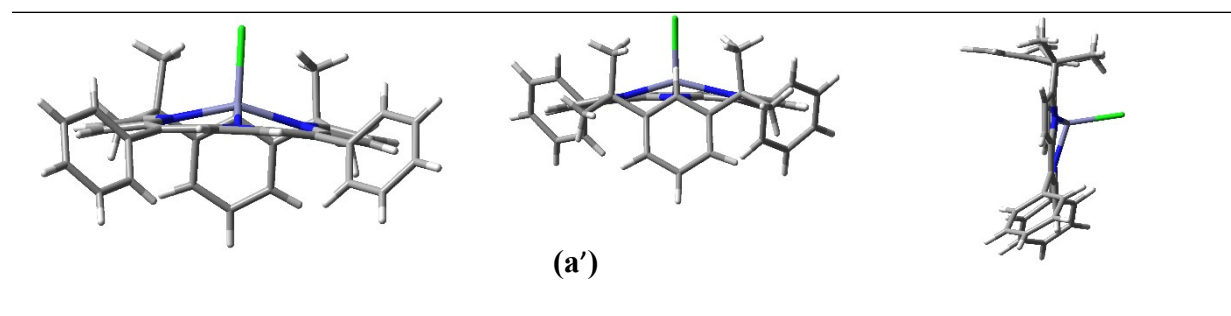

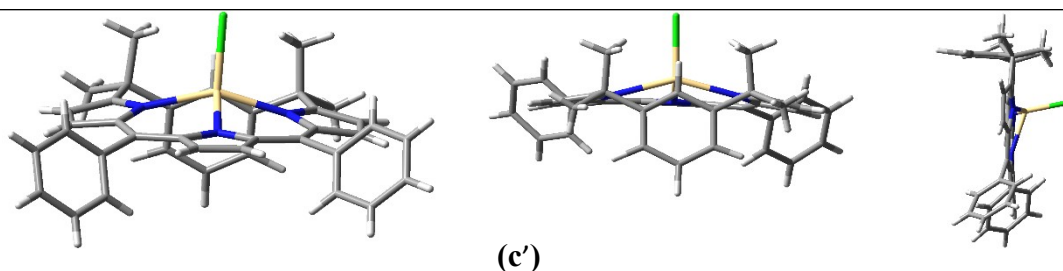

**Table S14.** Xyz-Coordinates of optimized geometry of compound 2 viz., free base m-BPDM, R''=Ph

|   |              |              |              |   |              |              |              |
|---|--------------|--------------|--------------|---|--------------|--------------|--------------|
| N | 2.088903000  | -1.030720000 | -0.130280000 | C | 8.141832000  | 0.435510000  | 2.123920000  |
| N | 2.047281000  | 1.626698000  | 0.102154000  | H | 0.349126000  | 8.478876000  | -2.513584000 |
| N | -1.001179000 | 1.467733000  | 0.322658000  | H | 9.152881000  | 0.458184000  | 2.473048000  |
| C | -0.997398000 | -3.552769000 | 1.342154000  | C | -4.427926000 | -0.087815000 | -0.003473000 |
| H | -0.459479000 | -4.472646000 | 1.447267000  | C | -5.636764000 | -0.520293000 | 0.556245000  |
| C | -2.043791000 | -3.243855000 | 2.219181000  | C | -4.328553000 | 0.114514000  | -1.387263000 |
| H | -2.308936000 | -3.927406000 | 2.998193000  | C | -6.747416000 | -0.749588000 | -0.266774000 |
| C | -2.743672000 | -2.036876000 | 2.075677000  | H | -5.711845000 | -0.675189000 | 1.612307000  |
| H | -3.537008000 | -1.797607000 | 2.752670000  | C | -5.439436000 | -0.114792000 | -2.210352000 |
| C | -2.409477000 | -1.142650000 | 1.045918000  | H | -3.404789000 | 0.444312000  | -1.815512000 |
| C | -1.369414000 | -1.452104000 | 0.172883000  | C | -6.649216000 | -0.546336000 | -1.650015000 |
| H | -1.112127000 | -0.775314000 | -0.615178000 | H | -7.670765000 | -1.079696000 | 0.160916000  |
| C | -0.657967000 | -2.649307000 | 0.329251000  | H | -5.363988000 | 0.039891000  | -3.266379000 |
| C | -3.208220000 | 0.166688000  | 0.900490000  | H | -7.498146000 | -0.720361000 | -2.278332000 |
| C | -2.358507000 | 1.299991000  | 0.266950000  | C | -3.676213000 | 0.612584000  | 2.298270000  |
| C | -3.008487000 | 2.444389000  | -0.535593000 | C | -4.880396000 | 1.315433000  | 2.440502000  |
| H | -4.050577000 | 2.536828000  | -0.760344000 | C | -2.900476000 | 0.316253000  | 3.427468000  |
| C | -2.053585000 | 3.304154000  | -0.898005000 | C | -5.308975000 | 1.721806000  | 3.711436000  |
| H | -2.191520000 | 4.207245000  | -1.454954000 | H | -5.472503000 | 1.541551000  | 1.578265000  |
| C | -0.728980000 | 2.761382000  | -0.368213000 | C | -3.329162000 | 0.723236000  | 4.698272000  |
| C | 0.498067000  | 3.443155000  | -0.534995000 | H | -1.980878000 | -0.220760000 | 3.319774000  |
| C | 1.754690000  | 2.903334000  | -0.208272000 | C | -4.533623000 | 1.425420000  | 4.840355000  |
| C | 2.940200000  | 3.649202000  | -0.158150000 | H | -6.228171000 | 2.258262000  | 3.819835000  |
| H | 3.042583000  | 4.693527000  | -0.366651000 | H | -2.736843000 | 0.497762000  | 5.560188000  |
| C | 3.956263000  | 2.780851000  | 0.217026000  | H | -4.861342000 | 1.735166000  | 5.810694000  |
| H | 4.986446000  | 3.028951000  | 0.367181000  | C | 0.207481000  | -2.263043000 | -1.983099000 |
| C | 3.373445000  | 1.521235000  | 0.355409000  | C | -1.116053000 | -2.114723000 | -2.419134000 |
| C | 4.040667000  | 0.340150000  | 0.700804000  | C | 1.263674000  | -1.801669000 | -2.780530000 |
| C | 3.355658000  | -0.865801000 | 0.567985000  | C | -1.383685000 | -1.501982000 | -3.650598000 |
| C | 3.747521000  | -2.235610000 | 1.086435000  | H | -1.922188000 | -2.469294000 | -1.811446000 |
| H | 4.629287000  | -2.489733000 | 1.637022000  | C | 0.995934000  | -1.189437000 | -4.012392000 |
| C | 2.751379000  | -3.067966000 | 0.713722000  | H | 2.274585000  | -1.916766000 | -2.449316000 |
| H | 2.704496000  | -4.114264000 | 0.933765000  | C | -0.327892000 | -1.037920000 | -4.446446000 |
| C | 1.776809000  | -2.338679000 | -0.020549000 | H | -2.394223000 | -1.388553000 | -3.982866000 |
| C | 0.500949000  | -2.932938000 | -0.627294000 | H | 1.802222000  | -0.837559000 | -4.621592000 |
| C | 0.456228000  | 4.873312000  | -1.103894000 | H | -0.532514000 | -0.567795000 | -5.385524000 |
| C | 1.647437000  | 5.587352000  | -1.291351000 | C | 0.674896000  | -4.449132000 | -0.835150000 |
| H | 2.586271000  | 5.136459000  | -1.043908000 | C | 1.943195000  | -4.980599000 | -1.106895000 |
| C | -0.772534000 | 5.460756000  | -1.433319000 | C | -0.436616000 | -5.297533000 | -0.750163000 |
| H | -1.681455000 | 4.913254000  | -1.294373000 | C | 2.099417000  | -6.361094000 | -1.291327000 |
| C | 1.608664000  | 6.891975000  | -1.802589000 | H | 2.792121000  | -4.332913000 | -1.173288000 |
| H | 2.517663000  | 7.437956000  | -1.945495000 | C | -0.280806000 | -6.677634000 | -0.933989000 |
| C | -0.811248000 | 6.765182000  | -1.943707000 | H | -1.404428000 | -4.891094000 | -0.544252000 |
| H | -1.749619000 | 7.214371000  | -2.193785000 | C | 0.987327000  | -7.209695000 | -1.203442000 |
| C | 0.379013000  | 7.481566000  | -2.126500000 | H | 3.067214000  | -6.767383000 | -1.499037000 |

|   |             |              |             |   |              |              |              |
|---|-------------|--------------|-------------|---|--------------|--------------|--------------|
| C | 5.493735000 | 0.373916000  | 1.208179000 | H | -1.130203000 | -7.325085000 | -0.868386000 |
| C | 6.167086000 | 1.597580000  | 1.321840000 | H | 1.106774000  | -8.263816000 | -1.341866000 |
| H | 5.670210000 | 2.508090000  | 1.058969000 | H | 1.389214000  | 0.874127000  | 0.139443000  |
| C | 6.143390000 | -0.818368000 | 1.554322000 |   |              |              |              |
| H | 5.629052000 | -1.752193000 | 1.468955000 |   |              |              |              |
| C | 7.491959000 | 1.628592000  | 1.778486000 |   |              |              |              |
| H | 8.007152000 | 2.562917000  | 1.863219000 |   |              |              |              |
| C | 7.467440000 | -0.787680000 | 2.011568000 |   |              |              |              |
| H | 7.964015000 | -1.698071000 | 2.274973000 |   |              |              |              |

**Table S15.** Xyz-Coordinates of optimized geometry of ZnCl-m-BPDM (compound 3)

|    |              |              |              |   |              |              |              |
|----|--------------|--------------|--------------|---|--------------|--------------|--------------|
| Zn | 0.615804000  | -0.150276000 | -0.256954000 | H | 3.128582000  | -7.775053000 | 3.387670000  |
| Cl | 1.013569000  | -0.289136000 | -3.399207000 | H | 8.803046000  | 2.476423000  | -1.823499000 |
| N  | 1.365430000  | 1.745882000  | -0.103366000 | C | -4.118622000 | -1.075295000 | 0.108598000  |
| N  | 2.384903000  | -0.988834000 | 0.112051000  | C | -5.237725000 | -0.474360000 | -0.516820000 |
| N  | -0.458280000 | -1.841648000 | 0.164462000  | C | -4.158340000 | -1.256070000 | 1.505490000  |
| C  | -1.575856000 | 2.588438000  | -1.995226000 | C | -6.364291000 | -0.087364000 | 0.224370000  |
| H  | -1.225294000 | 3.569691000  | -2.299714000 | H | -5.224308000 | -0.299153000 | -1.589527000 |
| C  | -2.121612000 | 1.717008000  | -2.946614000 | C | -5.286317000 | -0.864708000 | 2.254549000  |
| H  | -2.220253000 | 2.041459000  | -3.979441000 | H | -3.312264000 | -1.699004000 | 2.020239000  |
| C  | -2.516529000 | 0.412815000  | -2.589769000 | C | -6.396881000 | -0.283441000 | 1.620247000  |
| H  | -2.920024000 | -0.247973000 | -3.348005000 | H | -7.211458000 | 0.369172000  | -0.282441000 |
| C  | -2.368752000 | -0.030575000 | -1.264142000 | H | -5.290057000 | -1.015722000 | 3.331687000  |
| C  | -1.859481000 | 0.877846000  | -0.305292000 | H | -7.267879000 | 0.016604000  | 2.198123000  |
| H  | -1.853089000 | 0.579384000  | 0.737768000  | C | -3.197930000 | -2.391301000 | -1.928492000 |
| C  | -1.462734000 | 2.183437000  | -0.645817000 | C | -4.408707000 | -3.110010000 | -1.997895000 |
| C  | -2.863059000 | -1.408335000 | -0.759215000 | C | -2.202391000 | -2.666730000 | -2.896299000 |
| C  | -1.791081000 | -2.167609000 | 0.046273000  | C | -4.630886000 | -4.057939000 | -3.016548000 |
| C  | -2.038960000 | -3.451967000 | 0.617935000  | H | -5.185124000 | -2.943877000 | -1.258821000 |
| H  | -2.992890000 | -3.958870000 | 0.623167000  | C | -2.422382000 | -3.606481000 | -3.914531000 |
| C  | -0.821894000 | -3.941186000 | 1.078171000  | H | -1.245452000 | -2.155765000 | -2.850955000 |
| H  | -0.639065000 | -4.902034000 | 1.535264000  | C | -3.642693000 | -4.308628000 | -3.983497000 |
| C  | 0.184028000  | -2.952065000 | 0.795563000  | H | -5.573813000 | -4.599446000 | -3.046781000 |
| C  | 1.579026000  | -3.146991000 | 1.013302000  | H | -1.640898000 | -3.794155000 | -4.646825000 |
| C  | 2.615440000  | -2.239648000 | 0.657476000  | H | -3.813502000 | -5.040461000 | -4.769516000 |
| C  | 4.047600000  | -2.417608000 | 0.804241000  | C | -0.946884000 | 2.602724000  | 1.850843000  |
| H  | 4.533131000  | -3.280119000 | 1.236681000  | C | -2.264498000 | 2.560742000  | 2.366307000  |
| C  | 4.656518000  | -1.273448000 | 0.310913000  | C | 0.117794000  | 2.283163000  | 2.718079000  |
| H  | 5.714222000  | -1.054934000 | 0.283585000  | C | -2.511179000 | 2.199949000  | 3.699261000  |
| C  | 3.600046000  | -0.367355000 | -0.102114000 | H | -3.102801000 | 2.819278000  | 1.724092000  |
| C  | 3.751784000  | 0.993791000  | -0.511881000 | C | -0.126234000 | 1.928479000  | 4.060680000  |
| C  | 2.712664000  | 1.975170000  | -0.473703000 | H | 1.138986000  | 2.302889000  | 2.354066000  |
| C  | 2.868016000  | 3.377919000  | -0.728445000 | C | -1.439361000 | 1.882577000  | 4.558313000  |
| H  | 3.770826000  | 3.858504000  | -1.073840000 | H | -3.534052000 | 2.171838000  | 4.067414000  |
| C  | 1.643179000  | 4.000064000  | -0.446341000 | H | 0.712264000  | 1.688596000  | 4.710614000  |
| H  | 1.418121000  | 5.051215000  | -0.530545000 | H | -1.626573000 | 1.608613000  | 5.593932000  |
| C  | 0.743044000  | 2.978155000  | -0.045221000 | C | -1.232649000 | 4.563038000  | 0.379361000  |
| C  | -0.730793000 | 3.088407000  | 0.380521000  | C | -0.527903000 | 5.526006000  | 1.140752000  |
| C  | 2.000163000  | -4.432377000 | 1.665686000  | C | -2.444323000 | 4.961457000  | -0.222964000 |
| C  | 2.755641000  | -5.391890000 | 0.953138000  | C | -0.991731000 | 6.845051000  | 1.258547000  |
| H  | 3.012070000  | -5.202834000 | -0.086160000 | H | 0.376828000  | 5.235931000  | 1.667088000  |
| C  | 1.658897000  | -4.702345000 | 0.011369000  | C | -2.916412000 | 6.283492000  | -0.104789000 |
| H  | 1.086689000  | -3.967667000 | 3.572365000  | H | -3.038297000 | 4.246030000  | -0.781429000 |
| C  | 3.155826000  | -6.592441000 | 1.568361000  | C | -2.189895000 | 7.236269000  | 0.628797000  |
| H  | 3.727423000  | -7.323438000 | 1.001275000  | H | -0.426674000 | 7.562204000  | 1.849536000  |
| C  | 2.067605000  | -5.897383000 | 3.630772000  | H | -3.853796000 | 6.561049000  | -0.581652000 |
| H  | 1.804068000  | -6.083400000 | 4.669370000  | H | -2.553663000 | 8.256888000  | 0.720498000  |
| C  | 2.816053000  | -6.849071000 | 2.910788000  |   |              |              |              |
| C  | 5.138292000  | 1.428137000  | -0.872543000 |   |              |              |              |

|   |             |             |              |
|---|-------------|-------------|--------------|
| C | 5.821170000 | 0.792235000 | -1.937352000 |
| H | 5.313335000 | 0.016185000 | -2.503645000 |
| C | 5.812325000 | 2.442821000 | -0.150681000 |
| H | 5.314512000 | 2.919268000 | 0.689430000  |
| C | 7.129936000 | 1.172508000 | -2.283409000 |
| H | 7.630919000 | 0.681683000 | -3.114410000 |
| C | 7.125857000 | 2.814404000 | -0.487961000 |
| H | 7.630475000 | 3.587822000 | 0.086488000  |
| C | 7.789172000 | 2.185019000 | -1.559483000 |

**Table S16.** Xyz-Coordinates of optimized geometry of CdCl-m-BPDM (compound 4)

|    |              |              |              |    |              |              |              |
|----|--------------|--------------|--------------|----|--------------|--------------|--------------|
| Cl | -0.470190000 | -1.860379000 | -1.284123000 | C  | -4.406199000 | -0.170953000 | 0.143284000  |
| N  | 2.084622000  | -0.990208000 | -0.189130000 | C  | -5.581622000 | -0.570590000 | 0.781086000  |
| N  | 1.970733000  | 1.722280000  | -0.039364000 | C  | -4.313348000 | -0.192423000 | -1.252986000 |
| N  | -1.062208000 | 1.548587000  | 0.222426000  | C  | -6.668019000 | -1.018811000 | 0.019793000  |
| C  | -0.827362000 | -3.246149000 | 1.849427000  | H  | -5.651121000 | -0.533452000 | 1.847556000  |
| H  | -0.265720000 | -4.132288000 | 2.047952000  | C  | -5.397334000 | -0.644324000 | -2.018202000 |
| C  | -1.806742000 | -2.812126000 | 2.762628000  | H  | -3.414920000 | 0.136240000  | -1.736359000 |
| H  | -1.978761000 | -3.364770000 | 3.660763000  | C  | -6.572954000 | -1.059883000 | -1.380223000 |
| C  | -2.566017000 | -1.658832000 | 2.496406000  | H  | -7.564195000 | -1.330599000 | 0.507239000  |
| H  | -3.310283000 | -1.332680000 | 3.193712000  | H  | -5.322912000 | -0.673966000 | -3.085883000 |
| C  | -2.345055000 | -0.936745000 | 1.317561000  | H  | -7.400575000 | -1.411936000 | -1.960937000 |
| C  | -1.351406000 | -1.336139000 | 0.441605000  | C  | -3.702949000 | 0.944878000  | 2.285509000  |
| H  | -1.165358000 | -0.745281000 | -0.434471000 | C  | -4.939798000 | 1.608269000  | 2.309584000  |
| C  | -0.589630000 | -2.508101000 | 0.681815000  | C  | -2.921454000 | 0.881077000  | 3.448929000  |
| C  | -3.208392000 | 0.291850000  | 0.979284000  | C  | -5.399989000 | 2.190883000  | 3.496607000  |
| C  | -2.407378000 | 1.348906000  | 0.181441000  | H  | -5.533658000 | 1.671237000  | 1.416061000  |
| C  | -3.077114000 | 2.372522000  | -0.755867000 | C  | -3.387565000 | 1.464137000  | 4.634336000  |
| H  | -4.106673000 | 2.387510000  | -1.026343000 | H  | -1.970524000 | 0.388926000  | 3.430439000  |
| C  | -2.150871000 | 3.248265000  | -1.154338000 | C  | -4.626653000 | 2.120166000  | 4.662403000  |
| H  | -2.302020000 | 4.096213000  | -1.785075000 | H  | -6.343694000 | 2.692548000  | 3.510664000  |
| C  | -0.833494000 | 2.813297000  | -0.523826000 | H  | -2.795359000 | 1.410391000  | 5.523395000  |
| C  | 0.369516000  | 3.544049000  | -0.614793000 | H  | -4.982574000 | 2.567256000  | 5.572867000  |
| C  | 1.626419000  | 3.027416000  | -0.200452000 | C  | 0.042079000  | -2.387373000 | -1.748289000 |
| C  | 2.752612000  | 3.810781000  | 0.097216000  | C  | -1.319731000 | -2.293495000 | -2.046116000 |
| H  | 2.819407000  | 4.872806000  | 0.047336000  | C  | 0.999389000  | -1.996136000 | -2.691864000 |
| C  | 3.769535000  | 2.953654000  | 0.471449000  | C  | -1.732891000 | -1.814092000 | -3.292256000 |
| H  | 4.752331000  | 3.239641000  | 0.778324000  | H  | -2.044970000 | -2.591431000 | -1.319771000 |
| C  | 3.268210000  | 1.647861000  | 0.368628000  | C  | 0.591653000  | -1.512521000 | -3.942679000 |
| C  | 3.986456000  | 0.455628000  | 0.637358000  | H  | 2.040559000  | -2.063653000 | -2.455663000 |
| C  | 3.361959000  | -0.769808000 | 0.463803000  | C  | -0.775633000 | -1.423102000 | -4.237214000 |
| C  | 3.853696000  | -2.120023000 | 0.938049000  | H  | -2.776765000 | -1.746816000 | -3.519786000 |
| H  | 4.784063000  | -2.337368000 | 1.412843000  | H  | 1.322583000  | -1.208752000 | -4.669486000 |
| C  | 2.865273000  | -2.983824000 | 0.660171000  | H  | -1.089759000 | -1.053794000 | -5.185508000 |
| H  | 2.868592000  | -4.023747000 | 0.889803000  | C  | 0.626391000  | -4.450881000 | -0.441957000 |
| C  | 1.809651000  | -2.294219000 | 0.020437000  | C  | 1.856568000  | -5.018980000 | -0.791207000 |
| C  | 0.478939000  | -2.919621000 | -0.373397000 | C  | -0.471370000 | -5.273256000 | -0.151367000 |
| C  | 0.308349000  | 4.987902000  | -1.160039000 | C  | 1.990173000  | -6.411494000 | -0.862197000 |
| C  | 1.482192000  | 5.751680000  | -1.230143000 | H  | 2.692841000  | -4.387344000 | -1.006384000 |
| H  | 2.415155000  | 5.323757000  | -0.931957000 | C  | -0.337913000 | -6.667384000 | -0.216949000 |
| C  | -0.911234000 | 5.556429000  | -1.582664000 | H  | -1.411773000 | -4.837845000 | 0.118875000  |
| H  | -1.811261000 | 4.981314000  | -1.551171000 | C  | 0.893517000  | -7.235055000 | -0.573693000 |
| C  | 1.442107000  | 7.078411000  | -1.691288000 | H  | 2.930423000  | -6.846418000 | -1.136593000 |
| H  | 2.341390000  | 7.652778000  | -1.725676000 | H  | -1.172458000 | -7.296101000 | 0.005293000  |
| C  | -0.946752000 | 6.883531000  | -2.047051000 | H  | 0.996750000  | -8.298484000 | -0.625350000 |
| H  | -1.879118000 | 7.317135000  | -2.359999000 | Cd | 0.737140000  | 0.054845000  | -0.470083000 |
| C  | 0.230009000  | 7.643875000  | -2.101956000 |    |              |              |              |
| C  | 5.441524000  | 0.501201000  | 1.142535000  |    |              |              |              |
| C  | 6.080090000  | 1.735242000  | 1.329266000  |    |              |              |              |

|   |             |              |              |
|---|-------------|--------------|--------------|
| H | 5.566279000 | 2.642428000  | 1.095186000  |
| C | 6.134532000 | -0.688862000 | 1.413434000  |
| H | 5.660938000 | -1.631201000 | 1.246469000  |
| C | 7.393069000 | 1.781234000  | 1.815315000  |
| H | 7.870416000 | 2.727879000  | 1.967948000  |
| C | 7.450431000 | -0.644167000 | 1.896429000  |
| H | 7.976676000 | -1.555491000 | 2.109734000  |
| C | 8.077422000 | 0.589670000  | 2.097329000  |
| H | 0.202054000 | 8.653489000  | -2.456018000 |
| H | 9.083135000 | 0.630473000  | 2.465915000  |

**Table S17.** Xyz-Coordinates of optimized geometry of free base m-BPDM R"<sup>=</sup>H

|   |              |              |              |   |              |              |              |
|---|--------------|--------------|--------------|---|--------------|--------------|--------------|
| N | -0.091613000 | -0.880787000 | -0.053972000 | H | -4.053793000 | -0.933244000 | 2.224092000  |
| H | -0.031041000 | 0.123183000  | -0.196057000 | H | -3.728158000 | -2.803935000 | -1.619293000 |
| N | -1.733652000 | 1.261663000  | -0.785320000 | H | 4.494527000  | -2.161779000 | 1.535466000  |
| N | 1.941854000  | 0.889303000  | 0.911655000  | H | 2.373903000  | -2.993218000 | -2.097602000 |
| C | -1.284948000 | -1.544371000 | 0.048237000  |   |              |              |              |
| C | -0.980573000 | -2.906402000 | 0.262048000  |   |              |              |              |
| H | -1.706293000 | -3.690241000 | 0.403660000  |   |              |              |              |
| C | 0.403836000  | -3.035547000 | 0.251530000  |   |              |              |              |
| H | 0.974047000  | -3.938831000 | 0.394414000  |   |              |              |              |
| C | 0.955540000  | -1.748196000 | 0.072708000  |   |              |              |              |
| C | -2.771737000 | 0.401800000  | -0.398800000 |   |              |              |              |
| C | -4.043344000 | 1.100549000  | -0.505670000 |   |              |              |              |
| H | -5.013262000 | 0.684806000  | -0.281377000 |   |              |              |              |
| C | -3.748394000 | 2.353053000  | -0.941845000 |   |              |              |              |
| H | -4.434560000 | 3.162776000  | -1.145845000 |   |              |              |              |
| C | -2.300951000 | 2.400991000  | -1.112559000 |   |              |              |              |
| C | 2.787348000  | -0.100203000 | 0.392390000  |   |              |              |              |
| C | 4.141637000  | 0.428851000  | 0.282947000  |   |              |              |              |
| H | 4.996910000  | -0.094921000 | -0.114078000 |   |              |              |              |
| C | 4.082786000  | 1.707901000  | 0.736749000  |   |              |              |              |
| H | 4.888820000  | 2.425174000  | 0.801797000  |   |              |              |              |
| C | 2.696858000  | 1.939674000  | 1.130868000  |   |              |              |              |
| C | -2.572913000 | -0.914744000 | -0.044387000 |   |              |              |              |
| C | -3.758708000 | -1.773197000 | 0.268106000  |   |              |              |              |
| C | -4.414538000 | -1.652544000 | 1.497936000  |   |              |              |              |
| C | -5.517940000 | -2.450898000 | 1.791551000  |   |              |              |              |
| H | -6.016016000 | -2.347153000 | 2.749009000  |   |              |              |              |
| C | -4.226674000 | -2.709020000 | -0.661326000 |   |              |              |              |
| C | -5.331730000 | -3.504348000 | -0.367175000 |   |              |              |              |
| H | -5.688497000 | -4.219893000 | -1.099566000 |   |              |              |              |
| C | -5.979184000 | -3.378373000 | 0.860216000  |   |              |              |              |
| H | -6.838687000 | -3.998427000 | 1.088486000  |   |              |              |              |
| C | 2.349337000  | -1.369201000 | 0.074642000  |   |              |              |              |
| C | 3.328864000  | -2.440619000 | -0.249537000 |   |              |              |              |
| C | 4.398794000  | -2.721382000 | 0.613052000  |   |              |              |              |
| C | 5.314086000  | -3.724589000 | 0.306133000  |   |              |              |              |
| H | 6.128936000  | -3.935189000 | 0.989619000  |   |              |              |              |
| C | 5.180024000  | -4.459527000 | -0.869541000 |   |              |              |              |
| H | 5.894640000  | -5.238705000 | -1.109540000 |   |              |              |              |
| C | 4.118756000  | -4.192690000 | -1.733424000 |   |              |              |              |
| H | 4.009916000  | -4.758731000 | -2.651693000 |   |              |              |              |
| C | 3.195780000  | -3.199624000 | -1.422416000 |   |              |              |              |
| C | 2.159658000  | 3.203564000  | 1.748383000  |   |              |              |              |
| C | -1.543869000 | 3.568570000  | -1.686365000 |   |              |              |              |
| C | 1.332194000  | 4.064191000  | 0.800467000  |   |              |              |              |
| C | 0.300123000  | 3.481377000  | 0.063529000  |   |              |              |              |
| H | 0.119319000  | 2.421895000  | 0.163693000  |   |              |              |              |

|   |              |             |              |
|---|--------------|-------------|--------------|
| C | -0.491910000 | 4.230576000 | -0.802729000 |
| C | -0.253829000 | 5.604946000 | -0.911245000 |
| H | -0.862922000 | 6.208887000 | -1.576659000 |
| C | 0.767971000  | 6.200794000 | -0.177390000 |
| H | 0.946988000  | 7.266722000 | -0.269152000 |
| C | 1.565225000  | 5.434143000 | 0.671519000  |
| H | 2.364454000  | 5.904678000 | 1.235369000  |
| H | 2.989395000  | 3.795213000 | 2.143337000  |
| H | 1.532096000  | 2.917620000 | 2.599641000  |
| H | -1.040038000 | 3.213379000 | -2.595039000 |
| H | -2.262241000 | 4.325669000 | -2.010851000 |

**Table S18.** Xyz-Coordinates of optimized geometry of free base m-BPDM R"=CH<sub>3</sub>

|   |              |              |              |   |              |              |              |
|---|--------------|--------------|--------------|---|--------------|--------------|--------------|
| N | 0.145528000  | -1.326304000 | 0.070732000  | H | 1.767279000  | 4.711788000  | 3.227267000  |
| H | 0.094693000  | -0.332945000 | 0.278288000  | H | 2.942336000  | 4.598755000  | 1.911950000  |
| N | 1.704011000  | 0.802130000  | 0.828666000  | H | 3.006971000  | 3.462645000  | 3.267715000  |
| N | -1.883871000 | 0.402290000  | -0.904709000 | C | -1.276525000 | 3.606607000  | -0.845129000 |
| C | 1.340146000  | -1.960087000 | -0.128436000 | C | -0.337080000 | 3.024699000  | 0.009489000  |
| C | 1.043449000  | -3.315689000 | -0.392444000 | H | -0.224357000 | 1.951479000  | -0.004917000 |
| H | 1.769271000  | -4.080231000 | -0.616258000 | C | 0.461044000  | 3.771971000  | 0.878975000  |
| C | -0.338308000 | -3.467597000 | -0.310942000 | C | 0.315047000  | 5.163255000  | 0.868576000  |
| H | -0.903737000 | -4.371709000 | -0.468995000 | H | 0.910904000  | 5.791027000  | 1.517849000  |
| C | -0.895236000 | -2.198047000 | -0.042904000 | C | -0.615384000 | 5.763605000  | 0.024082000  |
| C | 2.758147000  | 0.029215000  | 0.321566000  | H | -0.722581000 | 6.843271000  | 0.028901000  |
| C | 3.984356000  | 0.806532000  | 0.372764000  | C | -1.412639000 | 4.998213000  | -0.823002000 |
| H | 4.960971000  | 0.470046000  | 0.061076000  | H | -2.127494000 | 5.498079000  | -1.463693000 |
| C | 3.646239000  | 2.016695000  | 0.891235000  | H | -2.095892000 | -3.484822000 | 2.166397000  |
| H | 4.305576000  | 2.850041000  | 1.078035000  | H | -4.620453000 | -2.495031000 | -1.156489000 |
| C | 2.214420000  | 1.961150000  | 1.180153000  | H | 3.838489000  | -3.297858000 | 1.250197000  |
| C | -2.711759000 | -0.533321000 | -0.270361000 | H | 4.041618000  | -1.008257000 | -2.368929000 |
| C | -4.020484000 | 0.063485000  | -0.040652000 | H | -5.788730000 | -5.588451000 | 1.579636000  |
| H | -4.852775000 | -0.403929000 | 0.462304000  | H | 6.928163000  | -4.098123000 | -1.621010000 |
| C | -3.951730000 | 1.326966000  | -0.535017000 |   |              |              |              |
| H | -4.733643000 | 2.071336000  | -0.527966000 |   |              |              |              |
| C | -2.604169000 | 1.482725000  | -1.087146000 |   |              |              |              |
| C | 2.606246000  | -1.280983000 | -0.084083000 |   |              |              |              |
| C | 3.805865000  | -2.063701000 | -0.511378000 |   |              |              |              |
| C | 4.436205000  | -1.790286000 | -1.730602000 |   |              |              |              |
| C | 5.554246000  | -2.520518000 | -2.127578000 |   |              |              |              |
| H | 6.030410000  | -2.299169000 | -3.076186000 |   |              |              |              |
| C | 4.315209000  | -3.084443000 | 0.300310000  |   |              |              |              |
| C | 5.435324000  | -3.810539000 | -0.096591000 |   |              |              |              |
| H | 5.824247000  | -4.592001000 | 0.546625000  |   |              |              |              |
| C | 6.057112000  | -3.531453000 | -1.311970000 |   |              |              |              |
| C | -2.285118000 | -1.808062000 | 0.045201000  |   |              |              |              |
| C | -3.252507000 | -2.852942000 | 0.463715000  |   |              |              |              |
| C | -4.431686000 | -3.078022000 | -0.263525000 |   |              |              |              |
| C | -5.336485000 | -4.057565000 | 0.135323000  |   |              |              |              |
| H | -6.237089000 | -4.224452000 | -0.444802000 |   |              |              |              |
| C | -5.082460000 | -4.826938000 | 1.268611000  |   |              |              |              |
| C | -3.912342000 | -4.617628000 | 1.997040000  |   |              |              |              |
| H | -3.709418000 | -5.210748000 | 2.881634000  |   |              |              |              |
| C | -3.001371000 | -3.647296000 | 1.594078000  |   |              |              |              |
| C | -2.060148000 | 2.702139000  | -1.826350000 |   |              |              |              |
| C | 1.388187000  | 3.039509000  | 1.879769000  |   |              |              |              |
| C | -1.079713000 | 2.233452000  | -2.930873000 |   |              |              |              |
| H | -0.656949000 | 3.101849000  | -3.442987000 |   |              |              |              |
| H | -1.600752000 | 1.611768000  | -3.664538000 |   |              |              |              |
| H | -0.268390000 | 1.643521000  | -2.507929000 |   |              |              |              |

|   |              |             |              |
|---|--------------|-------------|--------------|
| C | -3.226895000 | 3.451850000 | -2.499804000 |
| H | -2.852647000 | 4.248039000 | -3.147025000 |
| H | -3.907151000 | 3.901016000 | -1.772614000 |
| H | -3.801736000 | 2.763867000 | -3.124300000 |
| C | 0.488659000  | 2.360370000 | 2.946580000  |
| H | -0.116930000 | 3.115121000 | 3.455112000  |
| H | 1.101955000  | 1.843323000 | 3.690281000  |
| H | -0.176703000 | 1.630500000 | 2.488216000  |
| C | 2.334616000  | 4.014922000 | 2.607044000  |

**Table S19.** Xyz-Coordinates of optimized geometry of syn conformer of Zn(II) m-BPDM, R"<sup>=</sup>H

|    |              |              |              |   |              |             |              |
|----|--------------|--------------|--------------|---|--------------|-------------|--------------|
| Zn | -0.000029000 | 1.005914000  | 0.671233000  | H | -3.340499000 | 4.333547000 | -0.080976000 |
| Cl | 0.000102000  | 1.575729000  | 2.959972000  | H | 2.375785000  | 3.962654000 | 1.346971000  |
| N  | 2.062658000  | 1.217187000  | 0.101061000  | H | 3.339742000  | 4.334088000 | -0.080901000 |
| N  | 0.000066000  | -0.946021000 | 0.071006000  |   |              |             |              |
| N  | -2.062768000 | 1.216940000  | 0.101204000  |   |              |             |              |
| C  | 1.221467000  | 4.416062000  | -1.829628000 |   |              |             |              |
| H  | 2.162163000  | 4.534913000  | -2.363668000 |   |              |             |              |
| C  | -0.000357000 | 4.612652000  | -2.501083000 |   |              |             |              |
| H  | -0.000374000 | 4.902517000  | -3.549413000 |   |              |             |              |
| C  | -1.222168000 | 4.415991000  | -1.829611000 |   |              |             |              |
| H  | -2.162876000 | 4.534816000  | -2.363636000 |   |              |             |              |
| C  | -1.225976000 | 4.055320000  | -0.467390000 |   |              |             |              |
| C  | -0.000321000 | 3.913661000  | 0.206018000  |   |              |             |              |
| H  | -0.000309000 | 3.689274000  | 1.271542000  |   |              |             |              |
| C  | 1.225310000  | 4.055413000  | -0.467393000 |   |              |             |              |
| C  | -2.501277000 | 3.726121000  | 0.279576000  |   |              |             |              |
| C  | -2.906677000 | 2.273260000  | 0.168884000  |   |              |             |              |
| C  | -4.289619000 | 1.847453000  | 0.162090000  |   |              |             |              |
| H  | -5.143447000 | 2.508943000  | 0.218971000  |   |              |             |              |
| C  | -4.284025000 | 0.471105000  | 0.085364000  |   |              |             |              |
| H  | -5.136436000 | -0.191341000 | 0.079053000  |   |              |             |              |
| C  | -2.892992000 | 0.047950000  | 0.029067000  |   |              |             |              |
| C  | -2.473995000 | -1.280913000 | -0.082329000 |   |              |             |              |
| C  | -1.113946000 | -1.743382000 | -0.124075000 |   |              |             |              |
| C  | -0.693827000 | -3.085180000 | -0.447036000 |   |              |             |              |
| H  | -1.348595000 | -3.912954000 | -0.674141000 |   |              |             |              |
| C  | 0.694252000  | -3.085088000 | -0.447013000 |   |              |             |              |
| H  | 1.349135000  | -3.912786000 | -0.674058000 |   |              |             |              |
| C  | 1.114191000  | -1.743226000 | -0.124064000 |   |              |             |              |
| C  | 2.474208000  | -1.280593000 | -0.082445000 |   |              |             |              |
| C  | 2.893041000  | 0.048329000  | 0.028810000  |   |              |             |              |
| C  | 4.284018000  | 0.471700000  | 0.085064000  |   |              |             |              |
| H  | 5.136531000  | -0.190611000 | 0.078725000  |   |              |             |              |
| C  | 4.289409000  | 1.848048000  | 0.161791000  |   |              |             |              |
| H  | 5.143146000  | 2.509662000  | 0.218584000  |   |              |             |              |
| C  | 2.906409000  | 2.273647000  | 0.168696000  |   |              |             |              |
| C  | 2.500675000  | 3.726387000  | 0.279551000  |   |              |             |              |
| C  | -3.531516000 | -2.341409000 | -0.206064000 |   |              |             |              |
| C  | -4.387325000 | -2.383763000 | -1.329934000 |   |              |             |              |
| H  | -4.273048000 | -1.642787000 | -2.116946000 |   |              |             |              |
| C  | -3.674259000 | -3.323805000 | 0.800285000  |   |              |             |              |
| H  | -3.023076000 | -3.296600000 | 1.670173000  |   |              |             |              |
| C  | -5.366228000 | -3.387717000 | -1.445628000 |   |              |             |              |
| H  | -6.010216000 | -3.413749000 | -2.321314000 |   |              |             |              |
| C  | -4.664338000 | -4.316868000 | 0.692545000  |   |              |             |              |
| H  | -4.772520000 | -5.056329000 | 1.482177000  |   |              |             |              |
| C  | -5.511592000 | -4.354800000 | -0.432429000 |   |              |             |              |
| C  | 3.531817000  | -2.341007000 | -0.206103000 |   |              |             |              |

|   |              |              |              |
|---|--------------|--------------|--------------|
| C | 4.387549000  | -2.383491000 | -1.330025000 |
| H | 4.273144000  | -1.642680000 | -2.117172000 |
| C | 3.674696000  | -3.323231000 | 0.800400000  |
| H | 3.023571000  | -3.295925000 | 1.670326000  |
| C | 5.366519000  | -3.387393000 | -1.445615000 |
| H | 6.010442000  | -3.413533000 | -2.321345000 |
| C | 4.664849000  | -4.316231000 | 0.692766000  |
| H | 4.773144000  | -5.055548000 | 1.482517000  |
| C | 5.512031000  | -4.354288000 | -0.432259000 |
| H | -6.272007000 | -5.127257000 | -0.518387000 |
| H | 6.272494000  | -5.126704000 | -0.518142000 |
| H | -2.376468000 | 3.962575000  | 1.346963000  |

**Table S20.** Xyz-Coordinates of optimized geometry of anti-conformer of Zn(II) m-BPDM, R"<sup>=</sup>H

|    |              |              |              |   |              |             |              |
|----|--------------|--------------|--------------|---|--------------|-------------|--------------|
| Zn | -0.151724000 | 1.020451000  | 0.229132000  | H | 2.450933000  | 4.407948000 | 0.951665000  |
| Cl | -0.720873000 | 1.485312000  | 2.449219000  | H | -2.053808000 | 2.904604000 | -2.817486000 |
| N  | -2.013050000 | 0.759112000  | -0.840040000 | H | -3.510164000 | 3.544587000 | -2.055313000 |
| N  | 0.204256000  | -0.973556000 | -0.092422000 |   |              |             |              |
| N  | 1.898969000  | 1.472341000  | -0.125891000 |   |              |             |              |
| C  | -2.281145000 | 4.591268000  | 0.123407000  |   |              |             |              |
| H  | -3.361789000 | 4.705928000  | 0.173194000  |   |              |             |              |
| C  | -1.462014000 | 5.211615000  | 1.081048000  |   |              |             |              |
| H  | -1.907619000 | 5.815854000  | 1.867032000  |   |              |             |              |
| C  | -0.070527000 | 5.018766000  | 1.052490000  |   |              |             |              |
| H  | 0.552269000  | 5.462897000  | 1.825540000  |   |              |             |              |
| C  | 0.519985000  | 4.228246000  | 0.048290000  |   |              |             |              |
| C  | -0.307566000 | 3.637095000  | -0.926989000 |   |              |             |              |
| H  | 0.141091000  | 3.073514000  | -1.744271000 |   |              |             |              |
| C  | -1.706351000 | 3.791786000  | -0.883607000 |   |              |             |              |
| C  | 2.020390000  | 4.039333000  | 0.008454000  |   |              |             |              |
| C  | 2.568170000  | 2.646552000  | -0.203570000 |   |              |             |              |
| C  | 3.980750000  | 2.430328000  | -0.434152000 |   |              |             |              |
| H  | 4.718636000  | 3.212841000  | -0.551830000 |   |              |             |              |
| C  | 4.178660000  | 1.065913000  | -0.461090000 |   |              |             |              |
| H  | 5.107867000  | 0.539279000  | -0.619302000 |   |              |             |              |
| C  | 2.885646000  | 0.435664000  | -0.252434000 |   |              |             |              |
| C  | 2.686629000  | -0.949117000 | -0.166435000 |   |              |             |              |
| C  | 1.423483000  | -1.619382000 | -0.049813000 |   |              |             |              |
| C  | 1.207244000  | -3.041109000 | 0.099968000  |   |              |             |              |
| H  | 1.978182000  | -3.793229000 | 0.175640000  |   |              |             |              |
| C  | -0.166874000 | -3.238265000 | 0.132129000  |   |              |             |              |
| H  | -0.692830000 | -4.177619000 | 0.217465000  |   |              |             |              |
| C  | -0.779871000 | -1.936520000 | -0.002960000 |   |              |             |              |
| C  | -2.185328000 | -1.666095000 | -0.143686000 |   |              |             |              |
| C  | -2.735753000 | -0.443222000 | -0.544336000 |   |              |             |              |
| C  | -4.143425000 | -0.209332000 | -0.827171000 |   |              |             |              |
| H  | -4.938730000 | -0.920401000 | -0.661179000 |   |              |             |              |
| C  | -4.250212000 | 1.069453000  | -1.338753000 |   |              |             |              |
| H  | -5.142804000 | 1.580092000  | -1.673852000 |   |              |             |              |
| C  | -2.917899000 | 1.632670000  | -1.336285000 |   |              |             |              |
| C  | -2.573671000 | 3.012147000  | -1.853775000 |   |              |             |              |
| C  | 3.904223000  | -1.829343000 | -0.194916000 |   |              |             |              |
| C  | 4.857891000  | -1.767091000 | 0.846675000  |   |              |             |              |
| H  | 4.700511000  | -1.080213000 | 1.674144000  |   |              |             |              |
| C  | 4.107056000  | -2.744050000 | -1.253543000 |   |              |             |              |
| H  | 3.381585000  | -2.797524000 | -2.061199000 |   |              |             |              |
| C  | 5.989577000  | -2.602661000 | 0.830483000  |   |              |             |              |
| H  | 6.707682000  | -2.551660000 | 1.645224000  |   |              |             |              |
| C  | 5.247537000  | -3.566876000 | -1.278097000 |   |              |             |              |

|   |              |              |              |
|---|--------------|--------------|--------------|
| H | 5.396909000  | -4.255242000 | -2.106390000 |
| C | 6.191282000  | -3.501903000 | -0.234194000 |
| C | -3.107460000 | -2.825133000 | 0.098227000  |
| C | -3.192826000 | -3.389655000 | 1.391841000  |
| H | -2.603640000 | -2.964086000 | 2.199992000  |
| C | -3.881751000 | -3.381700000 | -0.944734000 |
| H | -3.804579000 | -2.968962000 | -1.947337000 |
| C | -4.051597000 | -4.475199000 | 1.640191000  |
| H | -4.119365000 | -4.888134000 | 2.643603000  |
| C | -4.727949000 | -4.478574000 | -0.698814000 |
| H | -5.309945000 | -4.903043000 | -1.513353000 |
| C | -4.819929000 | -5.025760000 | 0.595468000  |
| H | 7.068830000  | -4.143781000 | -0.249583000 |
| H | -5.478343000 | -5.869678000 | 0.786937000  |
| H | 2.456200000  | 4.677809000  | -0.777430000 |

**Table S21.** Xyz-Coordinates of optimized geometry of syn conformer of Cd(II) m-BPDM, R''=H

|    |              |              |              |   |              |              |              |
|----|--------------|--------------|--------------|---|--------------|--------------|--------------|
| Cd | 0.000026000  | -1.114864000 | 0.770678000  | H | 3.337666000  | -4.283322000 | -0.321958000 |
| Cl | 0.000287000  | -1.922903000 | 3.146761000  | H | -2.402681000 | -3.923509000 | 1.128800000  |
| N  | 2.152703000  | -1.153173000 | 0.008769000  | H | -3.337589000 | -4.283440000 | -0.321350000 |
| N  | 0.000013000  | 1.016558000  | 0.092392000  |   |              |              |              |
| N  | -2.152713000 | -1.153174000 | 0.008830000  |   |              |              |              |
| C  | -1.221448000 | -4.050964000 | -2.086092000 |   |              |              |              |
| H  | -2.160743000 | -4.079240000 | -2.634786000 |   |              |              |              |
| C  | -0.000165000 | -4.152334000 | -2.777626000 |   |              |              |              |
| H  | -0.000251000 | -4.284904000 | -3.857131000 |   |              |              |              |
| C  | 1.221223000  | -4.050965000 | -2.086281000 |   |              |              |              |
| H  | 2.160438000  | -4.079247000 | -2.635111000 |   |              |              |              |
| C  | 1.231812000  | -3.893940000 | -0.685334000 |   |              |              |              |
| C  | 2.531229000  | -3.651281000 | 0.070209000  |   |              |              |              |
| C  | 2.994086000  | -2.207030000 | 0.005260000  |   |              |              |              |
| C  | 4.374044000  | -1.767541000 | -0.028824000 |   |              |              |              |
| H  | 5.239159000  | -2.416920000 | -0.029188000 |   |              |              |              |
| C  | 4.351638000  | -0.385133000 | -0.044743000 |   |              |              |              |
| H  | 5.200393000  | 0.282357000  | -0.050662000 |   |              |              |              |
| C  | 2.952660000  | 0.028386000  | -0.039931000 |   |              |              |              |
| C  | 2.490164000  | 1.351635000  | -0.099924000 |   |              |              |              |
| C  | 1.118051000  | 1.805250000  | -0.117579000 |   |              |              |              |
| C  | 0.693718000  | 3.146979000  | -0.455163000 |   |              |              |              |
| H  | 1.345989000  | 3.972656000  | -0.697053000 |   |              |              |              |
| C  | -0.693745000 | 3.146969000  | -0.455139000 |   |              |              |              |
| H  | -1.346022000 | 3.972642000  | -0.697016000 |   |              |              |              |
| C  | -1.118076000 | 1.805232000  | -0.117563000 |   |              |              |              |
| C  | -2.490178000 | 1.351617000  | -0.099876000 |   |              |              |              |
| C  | -2.952680000 | 0.028358000  | -0.039860000 |   |              |              |              |
| C  | -4.351643000 | -0.385176000 | -0.044704000 |   |              |              |              |
| H  | -5.200417000 | 0.282290000  | -0.050686000 |   |              |              |              |
| C  | -4.374031000 | -1.767594000 | -0.028593000 |   |              |              |              |
| H  | -5.239147000 | -2.416972000 | -0.028866000 |   |              |              |              |
| C  | -2.994082000 | -2.207062000 | 0.005495000  |   |              |              |              |
| C  | -2.531135000 | -3.651279000 | 0.070585000  |   |              |              |              |
| C  | -1.231826000 | -3.893942000 | -0.685146000 |   |              |              |              |
| C  | 0.000047000  | -3.867732000 | 0.005129000  |   |              |              |              |
| C  | 3.526991000  | 2.435694000  | -0.206177000 |   |              |              |              |
| C  | 3.655012000  | 3.397679000  | 0.821933000  |   |              |              |              |
| H  | 3.005450000  | 3.340151000  | 1.691495000  |   |              |              |              |
| C  | 4.627597000  | 4.409792000  | 0.735704000  |   |              |              |              |
| H  | 4.724723000  | 5.132524000  | 1.542078000  |   |              |              |              |
| C  | 5.470977000  | 4.488897000  | -0.390061000 |   |              |              |              |

|   |              |              |              |
|---|--------------|--------------|--------------|
| H | 6.217503000  | 5.276392000  | -0.459718000 |
| C | 5.339082000  | 3.543785000  | -1.425572000 |
| H | 5.979308000  | 3.602242000  | -2.302454000 |
| C | 4.378612000  | 2.519989000  | -1.330977000 |
| H | 4.274505000  | 1.796527000  | -2.135389000 |
| C | -3.527034000 | 2.435649000  | -0.206178000 |
| C | -4.378536000 | 2.519981000  | -1.331068000 |
| H | -4.274289000 | 1.796591000  | -2.135526000 |
| C | -5.339045000 | 3.543733000  | -1.425702000 |
| H | -5.979165000 | 3.602227000  | -2.302659000 |
| C | -5.471118000 | 4.488759000  | -0.390135000 |
| H | -6.217678000 | 5.276218000  | -0.459824000 |
| C | -4.627875000 | 4.409608000  | 0.735729000  |
| H | -4.725142000 | 5.132267000  | 1.542151000  |
| C | -3.655241000 | 3.397545000  | 0.821995000  |
| H | -3.005792000 | 3.339976000  | 1.691636000  |
| H | 0.000131000  | -3.823868000 | 1.094630000  |
| H | 2.402988000  | -3.923677000 | 1.128409000  |

**Table S22.** Xyz-Coordinates of optimized geometry of anti-conformer of Cd(II) m-BPDM, R''=H

|    |              |              |              |   |              |              |              |
|----|--------------|--------------|--------------|---|--------------|--------------|--------------|
| Cd | -0.000012000 | -1.147718000 | 0.336686000  | H | -3.359557000 | -4.161586000 | -0.829770000 |
| Cl | -0.000128000 | -1.590452000 | 2.792912000  | H | 2.497364000  | -3.663010000 | -2.272686000 |
| N  | -2.131020000 | -1.085634000 | -0.543897000 | H | 3.359477000  | -4.161687000 | -0.829559000 |
| N  | 0.000025000  | 1.054689000  | -0.213345000 |   |              |              |              |
| N  | 2.131018000  | -1.085704000 | -0.543833000 |   |              |              |              |
| C  | 1.219387000  | -4.741994000 | 0.618242000  |   |              |              |              |
| H  | 2.157876000  | -5.025409000 | 1.088501000  |   |              |              |              |
| C  | -0.000114000 | -5.133495000 | 1.197280000  |   |              |              |              |
| H  | -0.000149000 | -5.719909000 | 2.111757000  |   |              |              |              |
| C  | -1.219570000 | -4.741949000 | 0.618177000  |   |              |              |              |
| H  | -2.158094000 | -5.025329000 | 1.088386000  |   |              |              |              |
| C  | -1.232958000 | -3.960336000 | -0.555014000 |   |              |              |              |
| C  | -2.542651000 | -3.517983000 | -1.181070000 |   |              |              |              |
| C  | -2.953809000 | -2.079529000 | -0.934195000 |   |              |              |              |
| C  | -4.301822000 | -1.591507000 | -1.143994000 |   |              |              |              |
| H  | -5.141832000 | -2.190415000 | -1.469889000 |   |              |              |              |
| C  | -4.284280000 | -0.241222000 | -0.852793000 |   |              |              |              |
| H  | -5.108158000 | 0.454063000  | -0.917164000 |   |              |              |              |
| C  | -2.919071000 | 0.106445000  | -0.480662000 |   |              |              |              |
| C  | -2.477096000 | 1.408141000  | -0.195166000 |   |              |              |              |
| C  | -1.115569000 | 1.855558000  | -0.044917000 |   |              |              |              |
| C  | -0.693408000 | 3.203979000  | 0.273382000  |   |              |              |              |
| H  | -1.345104000 | 4.037628000  | 0.487432000  |   |              |              |              |
| C  | 0.693515000  | 3.203964000  | 0.273368000  |   |              |              |              |
| H  | 1.345235000  | 4.037598000  | 0.487409000  |   |              |              |              |
| C  | 1.115641000  | 1.855527000  | -0.044910000 |   |              |              |              |
| C  | 2.477155000  | 1.408071000  | -0.195148000 |   |              |              |              |
| C  | 2.919097000  | 0.106360000  | -0.480622000 |   |              |              |              |
| C  | 4.284300000  | -0.241347000 | -0.852735000 |   |              |              |              |
| H  | 5.108195000  | 0.453917000  | -0.917117000 |   |              |              |              |
| C  | 4.301811000  | -1.591638000 | -1.143913000 |   |              |              |              |
| H  | 5.141808000  | -2.190571000 | -1.469793000 |   |              |              |              |
| C  | 2.953787000  | -2.079626000 | -0.934103000 |   |              |              |              |
| C  | 2.542610000  | -3.518082000 | -1.180939000 |   |              |              |              |
| C  | 1.232867000  | -3.960381000 | -0.554948000 |   |              |              |              |
| C  | -0.000023000 | -3.587401000 | -1.137714000 |   |              |              |              |
| C  | -3.538607000 | 2.464136000  | -0.059662000 |   |              |              |              |
| C  | -3.612481000 | 3.543753000  | -0.969332000 |   |              |              |              |
| H  | -2.896301000 | 3.606719000  | -1.784511000 |   |              |              |              |

|   |              |              |              |
|---|--------------|--------------|--------------|
| C | -4.616919000 | 4.519497000  | -0.839293000 |
| H | -4.670020000 | 5.336266000  | -1.555093000 |
| C | -5.549688000 | 4.441145000  | 0.213752000  |
| H | -6.320905000 | 5.200512000  | 0.318559000  |
| C | -5.475791000 | 3.374871000  | 1.130474000  |
| H | -6.186047000 | 3.309983000  | 1.951033000  |
| C | -4.482830000 | 2.388152000  | 0.989647000  |
| H | -4.423658000 | 1.569032000  | 1.701489000  |
| C | 3.538689000  | 2.464047000  | -0.059667000 |
| C | 4.482938000  | 2.388042000  | 0.989618000  |
| H | 4.423773000  | 1.568920000  | 1.701456000  |
| C | 5.475916000  | 3.374745000  | 1.130423000  |
| H | 6.186193000  | 3.309842000  | 1.950962000  |
| C | 5.549804000  | 4.441023000  | 0.213705000  |
| H | 6.321036000  | 5.200378000  | 0.318496000  |
| C | 4.617008000  | 4.519397000  | -0.839314000 |
| H | 4.670101000  | 5.336170000  | -1.555110000 |
| C | 3.612552000  | 3.543668000  | -0.969331000 |
| H | 2.896349000  | 3.606650000  | -1.784490000 |
| H | 0.000011000  | -3.026393000 | -2.072135000 |
| H | -2.497339000 | -3.662864000 | -2.272821000 |

**Table S23.** Xyz-Coordinates of optimized geometry of syn conformer of Zn(II) m-BPDM, R" $\text{=CH}_3$

|    |              |              |              |   |              |             |              |
|----|--------------|--------------|--------------|---|--------------|-------------|--------------|
| Zn | -0.000033000 | -0.638799000 | 0.498225000  | C | 4.735967000  | 4.527491000 | -1.314012000 |
| Cl | -0.000093000 | -1.024938000 | 2.834736000  | H | 4.894535000  | 5.117491000 | -2.213504000 |
| N  | -2.095498000 | -0.834452000 | -0.014977000 | C | 5.311808000  | 3.986055000 | 0.988802000  |
| N  | 0.000133000  | 1.318215000  | -0.105755000 | H | 5.909654000  | 4.162061000 | 1.879696000  |
| N  | 2.095311000  | -0.834777000 | -0.014578000 | C | 5.522198000  | 4.760418000 | -0.168453000 |
| C  | -1.219778000 | -3.665203000 | -2.103453000 | C | -3.531848000 | 2.745997000 | -0.145537000 |
| H  | -2.149236000 | -3.685111000 | -2.664414000 | C | -3.740511000 | 3.533475000 | -1.299621000 |
| C  | -0.000337000 | -3.736279000 | -2.796165000 | H | -3.136002000 | 3.356492000 | -2.185707000 |
| H  | -0.000330000 | -3.825639000 | -3.880173000 | C | -4.327274000 | 2.980710000 | 0.998138000  |
| C  | 1.219099000  | -3.665385000 | -2.103426000 | H | -4.163435000 | 2.386238000 | 1.893313000  |
| H  | 2.148563000  | -3.685448000 | -2.664370000 | C | -4.734847000 | 4.528715000 | -1.313949000 |
| C  | 1.232148000  | -3.549368000 | -0.697043000 | H | -4.893120000 | 5.118999000 | -2.213306000 |
| C  | -0.000352000 | -3.507952000 | -0.016566000 | C | -5.311280000 | 3.986704000 | 0.988579000  |
| H  | -0.000354000 | -3.455331000 | 1.064249000  | H | -5.909283000 | 4.162558000 | 1.879397000  |
| C  | -1.232846000 | -3.549184000 | -0.697070000 | C | -5.521289000 | 4.761443000 | -0.168495000 |
| C  | 2.553425000  | -3.353802000 | 0.067775000  | H | 6.286197000  | 5.534076000 | -0.177588000 |
| C  | 2.957545000  | -1.883442000 | -0.047294000 | H | -6.285148000 | 5.535239000 | -0.177567000 |
| C  | 4.330065000  | -1.427378000 | -0.150913000 |   |              |             |              |
| H  | 5.201616000  | -2.061502000 | -0.209742000 |   |              |             |              |
| C  | 4.296154000  | -0.051121000 | -0.178296000 |   |              |             |              |
| H  | 5.132205000  | 0.626112000  | -0.269252000 |   |              |             |              |
| C  | 2.901277000  | 0.349091000  | -0.091774000 |   |              |             |              |
| C  | 2.471837000  | 1.678242000  | -0.123225000 |   |              |             |              |
| C  | 1.113706000  | 2.140480000  | -0.136627000 |   |              |             |              |
| C  | 0.694102000  | 3.520234000  | -0.169480000 |   |              |             |              |
| H  | 1.348789000  | 4.378419000  | -0.175313000 |   |              |             |              |
| C  | -0.693365000 | 3.520376000  | -0.169585000 |   |              |             |              |
| H  | -1.347867000 | 4.378703000  | -0.175475000 |   |              |             |              |
| C  | -1.113258000 | 2.140704000  | -0.136782000 |   |              |             |              |
| C  | -2.471486000 | 1.678707000  | -0.123499000 |   |              |             |              |
| C  | -2.901179000 | 0.349613000  | -0.092120000 |   |              |             |              |
| C  | -4.296139000 | -0.050300000 | -0.178804000 |   |              |             |              |
| H  | -5.132032000 | 0.627113000  | -0.269865000 |   |              |             |              |
| C  | -4.330386000 | -1.426547000 | -0.151173000 |   |              |             |              |
| H  | -5.202086000 | -2.060471000 | -0.209934000 |   |              |             |              |

|   |              |              |              |
|---|--------------|--------------|--------------|
| C | -2.957974000 | -1.882920000 | -0.047577000 |
| C | -2.554133000 | -3.353339000 | 0.067673000  |
| C | 3.660798000  | -4.273383000 | -0.523434000 |
| H | 3.307856000  | -5.311302000 | -0.524744000 |
| H | 4.569041000  | -4.230859000 | 0.088270000  |
| H | 3.935455000  | -4.004492000 | -1.549164000 |
| C | 2.436294000  | -3.692862000 | 1.588899000  |
| H | 3.423550000  | -3.602514000 | 2.058001000  |
| H | 2.090464000  | -4.726980000 | 1.718440000  |
| H | 1.760626000  | -3.017674000 | 2.122227000  |
| C | -2.437185000 | -3.692262000 | 1.588841000  |
| H | -1.761621000 | -3.017000000 | 2.122207000  |
| H | -2.091335000 | -4.726356000 | 1.718525000  |
| H | -3.424505000 | -3.601907000 | 2.057806000  |
| C | -3.661601000 | -4.272799000 | -0.523536000 |
| H | -4.569977000 | -4.229871000 | 0.087942000  |
| H | -3.308919000 | -5.310804000 | -0.524478000 |
| H | -3.935933000 | -4.004119000 | -1.549409000 |
| C | 3.532406000  | 2.745341000  | -0.145327000 |
| C | 3.741456000  | 3.532422000  | -1.299608000 |
| H | 3.137092000  | 3.355283000  | -2.185762000 |
| C | 4.327618000  | 2.980237000  | 0.998447000  |
| H | 4.163502000  | 2.386034000  | 1.893750000  |

**Table S24.** Xyz-Coordinates of optimized geometry of anti conformer of Zn(II) m-BPDM, R"=CH<sub>3</sub>.

|    |              |              |              |   |              |             |              |
|----|--------------|--------------|--------------|---|--------------|-------------|--------------|
| Zn | -0.086463000 | -0.634512000 | 0.426007000  | C | -3.807120000 | 5.482383000 | 0.488365000  |
| Cl | 0.274262000  | -1.100897000 | 2.694602000  | H | -3.951231000 | 6.162762000 | 1.324135000  |
| N  | 1.733925000  | -1.074253000 | -0.657521000 | C | -4.195171000 | 4.877099000 | -1.837512000 |
| N  | 0.290973000  | 1.337489000  | 0.029359000  | H | -4.632488000 | 5.092558000 | -2.809491000 |
| N  | -2.163194000 | -0.367818000 | 0.036121000  | C | -4.384803000 | 5.768764000 | -0.764101000 |
| C  | 0.746007000  | -4.563709000 | 0.451863000  | C | 4.038191000  | 1.895247000 | 0.225773000  |
| H  | 1.735263000  | -5.009785000 | 0.473221000  | C | 4.255567000  | 2.513335000 | 1.479586000  |
| C  | -0.132173000 | -4.802138000 | 1.516780000  | H | 3.509612000  | 2.406783000 | 2.262880000  |
| H  | 0.181625000  | -5.435202000 | 2.342891000  | C | 5.015725000  | 2.037622000 | -0.785476000 |
| C  | -1.395897000 | -4.190808000 | 1.553438000  | H | 4.843835000  | 1.592701000 | -1.762064000 |
| H  | -2.029568000 | -4.353803000 | 2.416794000  | C | 5.436881000  | 3.235693000 | 1.723300000  |
| C  | -1.807988000 | -3.348129000 | 0.504623000  | H | 5.597755000  | 3.690101000 | 2.697763000  |
| C  | -0.922438000 | -3.141749000 | -0.577263000 | C | 6.189573000  | 2.775122000 | -0.546080000 |
| H  | -1.258855000 | -2.533171000 | -1.410325000 | H | 6.927008000  | 2.885470000 | -1.337537000 |
| C  | 0.360774000  | -3.722817000 | -0.615300000 | C | 6.407250000  | 3.371570000 | 0.710866000  |
| C  | -3.204358000 | -2.709689000 | 0.468364000  | H | -4.972824000 | 6.673022000 | -0.901429000 |
| C  | -3.213136000 | -1.226456000 | 0.080445000  | H | 7.317085000  | 3.936987000 | 0.897724000  |
| C  | -4.459709000 | -0.520797000 | -0.159624000 |   |              |             |              |
| H  | -5.443236000 | -0.967311000 | -0.178899000 |   |              |             |              |
| C  | -4.151508000 | 0.811230000  | -0.317647000 |   |              |             |              |
| H  | -4.837661000 | 1.628781000  | -0.480684000 |   |              |             |              |
| C  | -2.710398000 | 0.941343000  | -0.193998000 |   |              |             |              |
| C  | -2.032435000 | 2.167295000  | -0.212794000 |   |              |             |              |
| C  | -0.620363000 | 2.367834000  | -0.073096000 |   |              |             |              |
| C  | 0.085321000  | 3.629833000  | -0.099816000 |   |              |             |              |
| H  | -0.367450000 | 4.605265000  | -0.197972000 |   |              |             |              |
| C  | 1.439157000  | 3.335317000  | -0.002511000 |   |              |             |              |
| H  | 2.264970000  | 4.031437000  | -0.013397000 |   |              |             |              |
| C  | 1.550631000  | 1.894854000  | 0.055881000  |   |              |             |              |
| C  | 2.769509000  | 1.131487000  | -0.006361000 |   |              |             |              |
| C  | 2.842627000  | -0.224960000 | -0.346077000 |   |              |             |              |
| C  | 4.065835000  | -0.972999000 | -0.586215000 |   |              |             |              |
| H  | 5.065794000  | -0.612792000 | -0.395833000 |   |              |             |              |

|   |              |              |              |
|---|--------------|--------------|--------------|
| C | 3.700797000  | -2.200730000 | -1.105474000 |
| H | 4.357742000  | -2.998526000 | -1.418190000 |
| C | 2.252768000  | -2.225521000 | -1.146456000 |
| C | 1.375311000  | -3.342933000 | -1.715068000 |
| C | -3.913598000 | -2.794777000 | 1.856738000  |
| H | -4.087129000 | -3.840520000 | 2.137789000  |
| H | -4.888727000 | -2.298381000 | 1.819683000  |
| H | -3.311527000 | -2.312651000 | 2.634805000  |
| C | -4.059735000 | -3.511702000 | -0.570964000 |
| H | -5.096978000 | -3.158829000 | -0.596959000 |
| H | -4.067246000 | -4.572695000 | -0.294362000 |
| H | -3.642010000 | -3.425741000 | -1.580662000 |
| C | 0.687879000  | -2.800351000 | -3.004963000 |
| H | 0.149200000  | -1.865023000 | -2.824958000 |
| H | -0.011429000 | -3.544042000 | -3.408329000 |
| H | 1.448467000  | -2.594510000 | -3.767760000 |
| C | 2.234889000  | -4.565521000 | -2.130544000 |
| H | 2.921915000  | -4.294246000 | -2.941378000 |
| H | 1.582940000  | -5.369166000 | -2.492436000 |
| H | 2.834372000  | -4.963532000 | -1.305695000 |
| C | -2.855304000 | 3.412530000  | -0.405339000 |
| C | -3.040852000 | 4.315576000  | 0.664835000  |
| H | -2.597900000 | 4.096268000  | 1.633029000  |
| C | -3.439523000 | 3.703547000  | -1.657723000 |
| H | -3.290902000 | 3.019079000  | -2.489228000 |

**Table S25.** Xyz-Coordinates of optimized geometry of syn conformer of Cd(II) m-BPDM, R"=CH<sub>3</sub>

|    |              |              |              |   |              |              |              |
|----|--------------|--------------|--------------|---|--------------|--------------|--------------|
| Cd | -0.000114000 | -0.760372000 | 0.650660000  | H | 6.262019000  | 5.619997000  | -0.236755000 |
| Cl | 0.000234000  | -1.268738000 | 3.120976000  | C | 4.639559000  | 4.659242000  | -1.310621000 |
| N  | 2.188162000  | -0.793461000 | -0.030659000 | H | 4.729596000  | 5.296675000  | -2.186911000 |
| N  | 0.000121000  | 1.361266000  | -0.084318000 | C | 3.654009000  | 3.656270000  | -1.277080000 |
| N  | -2.188344000 | -0.793207000 | -0.030531000 | H | 2.988197000  | 3.520505000  | -2.125503000 |
| C  | -1.219197000 | -3.358479000 | -2.246409000 | C | -3.532449000 | 2.807247000  | -0.154238000 |
| H  | -2.148292000 | -3.292208000 | -2.804912000 | C | -3.653495000 | 3.656614000  | -1.277196000 |
| C  | -0.000439000 | -3.347869000 | -2.942689000 | H | -2.987788000 | 3.520582000  | -2.125658000 |
| H  | -0.000504000 | -3.298696000 | -4.029158000 | C | -4.638852000 | 4.659778000  | -1.310810000 |
| C  | 1.218401000  | -3.358627000 | -2.246558000 | H | -4.728844000 | 5.297080000  | -2.187199000 |
| H  | 2.147439000  | -3.292513000 | -2.805172000 | C | -5.504482000 | 4.840351000  | -0.213942000 |
| C  | 1.237874000  | -3.421964000 | -0.836690000 | H | -6.261018000 | 5.621031000  | -0.236947000 |
| C  | 2.584733000  | -3.299659000 | -0.082871000 | C | -5.383138000 | 4.004273000  | 0.912580000  |
| C  | 3.038385000  | -1.835745000 | -0.163398000 | H | -6.042459000 | 4.139403000  | 1.766447000  |
| C  | 4.397912000  | -1.364465000 | -0.352174000 | C | -4.409123000 | 2.988917000  | 0.939074000  |
| H  | 5.269370000  | -1.985505000 | -0.498552000 | H | -4.314778000 | 2.346862000  | 1.810988000  |
| C  | 4.350448000  | 0.016034000  | -0.328185000 | H | -0.000220000 | -3.591091000 | 0.925520000  |
| H  | 5.174553000  | 0.701086000  | -0.462255000 |   |              |              |              |
| C  | 2.958629000  | 0.402278000  | -0.130514000 |   |              |              |              |
| C  | 2.487824000  | 1.724287000  | -0.115346000 |   |              |              |              |
| C  | 1.118220000  | 2.178819000  | -0.082416000 |   |              |              |              |
| C  | 0.693721000  | 3.562259000  | -0.051418000 |   |              |              |              |
| H  | 1.344221000  | 4.422979000  | -0.016853000 |   |              |              |              |
| C  | -0.693250000 | 3.562337000  | -0.051355000 |   |              |              |              |
| H  | -1.343656000 | 4.423128000  | -0.016766000 |   |              |              |              |
| C  | -1.117908000 | 2.178947000  | -0.082373000 |   |              |              |              |
| C  | -2.487563000 | 1.724607000  | -0.115252000 |   |              |              |              |
| C  | -2.958595000 | 0.402664000  | -0.130391000 |   |              |              |              |
| C  | -4.350451000 | 0.016658000  | -0.328252000 |   |              |              |              |
| H  | -5.174435000 | 0.701832000  | -0.462425000 |   |              |              |              |
| C  | -4.398179000 | -1.363845000 | -0.352041000 |   |              |              |              |

|   |              |              |              |
|---|--------------|--------------|--------------|
| H | -5.269744000 | -1.984733000 | -0.498441000 |
| C | -3.038761000 | -1.835353000 | -0.163234000 |
| C | -2.585269000 | -3.299306000 | -0.082574000 |
| C | -1.238518000 | -3.421835000 | -0.836540000 |
| C | -0.000280000 | -3.484075000 | -0.153704000 |
| C | 2.479593000  | -3.692299000 | 1.423282000  |
| H | 1.816805000  | -3.034307000 | 1.993691000  |
| H | 3.472359000  | -3.631352000 | 1.885068000  |
| H | 2.123793000  | -4.726726000 | 1.520476000  |
| C | 3.648496000  | -4.232436000 | -0.729467000 |
| H | 3.277104000  | -5.263836000 | -0.734213000 |
| H | 4.579356000  | -4.213879000 | -0.150661000 |
| H | 3.889416000  | -3.952331000 | -1.760529000 |
| C | -2.480028000 | -3.691731000 | 1.423644000  |
| H | -1.817254000 | -3.033615000 | 1.993922000  |
| H | -2.124152000 | -4.726119000 | 1.520969000  |
| H | -3.472784000 | -3.630788000 | 1.885446000  |
| C | -3.649215000 | -4.232054000 | -0.728882000 |
| H | -4.580006000 | -4.213282000 | -0.149972000 |
| H | -3.277948000 | -5.263500000 | -0.733503000 |
| H | -3.890215000 | -3.952100000 | -1.759966000 |
| C | 3.532893000  | 2.806743000  | -0.154244000 |
| C | 4.409732000  | 2.988037000  | 0.938996000  |
| H | 4.315361000  | 2.345835000  | 1.810799000  |
| C | 5.383943000  | 4.003209000  | 0.912579000  |
| H | 6.043382000  | 4.138049000  | 1.766401000  |
| C | 5.505332000  | 4.839462000  | -0.213805000 |

**Table S26.** Xyz-Coordinates of optimized geometry of anti conformer of Cd(II) m-BPDM, R"=CH<sub>3</sub>

|    |              |              |              |   |              |              |              |
|----|--------------|--------------|--------------|---|--------------|--------------|--------------|
| Cd | 0.099873000  | -0.733347000 | 0.576690000  | H | -7.371701000 | 4.008454000  | 0.635547000  |
| Cl | -0.196936000 | -1.012774000 | 3.040419000  | C | -5.590035000 | 3.779017000  | -0.581569000 |
| N  | -1.873570000 | -1.095949000 | -0.572353000 | H | -5.848832000 | 4.586641000  | -1.262129000 |
| N  | -0.290487000 | 1.381599000  | -0.144697000 | C | -4.393359000 | 3.065073000  | -0.771029000 |
| N  | 2.265696000  | -0.322145000 | -0.085201000 | H | -3.735696000 | 3.318182000  | -1.598533000 |
| C  | 1.603713000  | -3.989784000 | 1.432816000  | C | 2.873823000  | 3.474176000  | -0.309184000 |
| H  | 2.348541000  | -4.105228000 | 2.210565000  | C | 2.613632000  | 4.436250000  | -1.313083000 |
| C  | 0.325467000  | -4.539773000 | 1.634741000  | H | 1.823082000  | 4.253529000  | -2.036026000 |
| H  | 0.111049000  | -5.068305000 | 2.559414000  | C | 3.382767000  | 5.610380000  | -1.395351000 |
| C  | -0.685892000 | -4.372128000 | 0.680695000  | H | 3.180541000  | 6.332567000  | -2.182601000 |
| H  | -1.673240000 | -4.774879000 | 0.881858000  | C | 4.409453000  | 5.852489000  | -0.461284000 |
| C  | -0.434701000 | -3.658133000 | -0.514093000 | H | 4.997781000  | 6.765121000  | -0.519487000 |
| C  | -1.574341000 | -3.416544000 | -1.531359000 | C | 4.666869000  | 4.906736000  | 0.549837000  |
| C  | -2.420305000 | -2.219483000 | -1.084634000 | H | 5.450365000  | 5.089130000  | 1.281202000  |
| C  | -3.849959000 | -2.056232000 | -1.270513000 | C | 3.911045000  | 3.722545000  | 0.619885000  |
| H  | -4.528521000 | -2.795903000 | -1.669683000 | H | 4.105748000  | 2.998173000  | 1.406175000  |
| C  | -4.162994000 | -0.776124000 | -0.849770000 | H | 1.086481000  | -2.596986000 | -1.626268000 |
| H  | -5.131768000 | -0.298387000 | -0.869382000 |   |              |              |              |
| C  | -2.921053000 | -0.141316000 | -0.430510000 |   |              |              |              |
| C  | -2.781761000 | 1.217406000  | -0.100335000 |   |              |              |              |
| C  | -1.543609000 | 1.945425000  | 0.020950000  |   |              |              |              |
| C  | -1.398119000 | 3.363512000  | 0.278341000  |   |              |              |              |
| H  | -2.200052000 | 4.056328000  | 0.484261000  |   |              |              |              |
| C  | -0.040469000 | 3.646439000  | 0.226520000  |   |              |              |              |
| H  | 0.431958000  | 4.604503000  | 0.384498000  |   |              |              |              |
| C  | 0.640584000  | 2.396755000  | -0.044530000 |   |              |              |              |
| C  | 2.059123000  | 2.215371000  | -0.220719000 |   |              |              |              |
| C  | 2.756394000  | 0.999565000  | -0.333610000 |   |              |              |              |
| C  | 4.145982000  | 0.884421000  | -0.750578000 |   |              |              |              |

|   |              |              |              |
|---|--------------|--------------|--------------|
| H | 4.779841000  | 1.709438000  | -1.039998000 |
| C | 4.469620000  | -0.456584000 | -0.747955000 |
| H | 5.419160000  | -0.897441000 | -1.016337000 |
| C | 3.287722000  | -1.178250000 | -0.308671000 |
| C | 3.291226000  | -2.687915000 | -0.033761000 |
| C | 1.892752000  | -3.269859000 | 0.257726000  |
| C | 0.859602000  | -3.123714000 | -0.704683000 |
| C | -1.026673000 | -3.071683000 | -2.953207000 |
| H | -0.473845000 | -2.126726000 | -2.961910000 |
| H | -1.863012000 | -2.965944000 | -3.654090000 |
| H | -0.371410000 | -3.873602000 | -3.317335000 |
| C | -2.459486000 | -4.686114000 | -1.672564000 |
| H | -1.834244000 | -5.551460000 | -1.921965000 |
| H | -3.191101000 | -4.556460000 | -2.478559000 |
| H | -3.013170000 | -4.916687000 | -0.756506000 |
| C | 3.876521000  | -3.433450000 | -1.279371000 |
| H | 3.266735000  | -3.266361000 | -2.174145000 |
| H | 3.905383000  | -4.511783000 | -1.081429000 |
| H | 4.897165000  | -3.099100000 | -1.497559000 |
| C | 4.270291000  | -2.911918000 | 1.159780000  |
| H | 5.255262000  | -2.496615000 | 0.922376000  |
| H | 4.399059000  | -3.982979000 | 1.358961000  |
| H | 3.909329000  | -2.422184000 | 2.071324000  |
| C | -4.048666000 | 1.999993000  | 0.092413000  |
| C | -4.922240000 | 1.669593000  | 1.153988000  |
| H | -4.656473000 | 0.860848000  | 1.829614000  |
| C | -6.110270000 | 2.396221000  | 1.353742000  |
| H | -6.764453000 | 2.139390000  | 2.183238000  |
| C | -6.450556000 | 3.450635000  | 0.484667000  |

**Table S27.** Xyz-Coordinates of optimized geometry of syn conformer of Zn(II) m-BPDM, R''=Ph.

|    |              |              |              |   |              |              |              |
|----|--------------|--------------|--------------|---|--------------|--------------|--------------|
| Zn | -0.509937000 | -0.476794000 | 0.460905000  | C | 2.514421000  | 4.353477000  | -0.183432000 |
| Cl | -0.562657000 | 0.033746000  | 2.761422000  | C | 0.926947000  | 3.906918000  | 1.593718000  |
| N  | 0.677311000  | -2.125197000 | -0.135609000 | C | 3.390881000  | 4.947712000  | 0.737111000  |
| N  | -2.224145000 | -1.438685000 | -0.084114000 | H | 2.812294000  | 4.272258000  | -1.226227000 |
| N  | -1.426225000 | 1.414153000  | -0.112972000 | C | 1.806535000  | 4.499970000  | 2.521209000  |
| C  | 2.727725000  | -0.195292000 | -2.362661000 | H | -0.000596000 | 3.477463000  | 1.957127000  |
| H  | 3.293668000  | -1.043650000 | -2.735562000 | C | 3.036459000  | 5.031258000  | 2.099508000  |
| C  | 2.192477000  | 0.731605000  | -3.261777000 | H | 4.347333000  | 5.337950000  | 0.396293000  |
| H  | 2.366722000  | 0.612854000  | -4.328571000 | H | 1.530033000  | 4.527436000  | 3.572240000  |
| C  | 1.422756000  | 1.817340000  | -2.800577000 | H | 3.713993000  | 5.488413000  | 2.816952000  |
| H  | 1.035239000  | 2.529762000  | -3.517870000 | C | -0.128081000 | 4.148487000  | -1.943740000 |
| C  | 1.169733000  | 1.972539000  | -1.426893000 | C | 0.233747000  | 5.510059000  | -1.976780000 |
| C  | 1.740071000  | 1.040341000  | -0.527197000 | C | -1.040752000 | 3.681994000  | -2.922764000 |
| H  | 1.615929000  | 1.197973000  | 0.541351000  | C | -0.274541000 | 6.372000000  | -2.970252000 |
| C  | 2.531025000  | -0.031747000 | -0.971405000 | H | 0.901712000  | 5.915397000  | -1.225844000 |
| C  | 0.350069000  | 3.150736000  | -0.833476000 | C | -1.547039000 | 4.535202000  | -3.914125000 |
| C  | -0.973120000 | 2.679102000  | -0.206298000 | H | -1.370545000 | 2.646044000  | -2.896117000 |
| C  | -1.979968000 | 3.634824000  | 0.238311000  | C | -1.161326000 | 5.890581000  | -3.947579000 |
| H  | -1.853329000 | 4.707596000  | 0.242950000  | H | 0.021586000  | 7.418584000  | -2.970654000 |
| C  | -3.095131000 | 2.913213000  | 0.581852000  | H | -2.245345000 | 4.147290000  | -4.652105000 |
| H  | -4.044969000 | 3.291380000  | 0.929570000  | H | -1.553951000 | 6.556584000  | -4.712265000 |
| C  | -2.788448000 | 1.508410000  | 0.352248000  | C | 3.050921000  | -0.711817000 | 1.494779000  |
| C  | -3.710556000 | 0.472521000  | 0.469121000  | C | 3.738033000  | 0.468445000  | 1.860911000  |
| C  | -3.470982000 | -0.916895000 | 0.172950000  | C | 2.558703000  | -1.546038000 | 2.515651000  |
| C  | -4.456152000 | -1.971320000 | 0.122408000  | C | 3.913750000  | 0.809912000  | 3.209545000  |
| H  | -5.513872000 | -1.856117000 | 0.306189000  | H | 4.150272000  | 1.117944000  | 1.092431000  |
| C  | -3.776562000 | -3.140932000 | -0.192150000 | C | 2.744302000  | -1.212363000 | 3.869341000  |
| H  | -4.193793000 | -4.131303000 | -0.296654000 | H | 2.007076000  | -2.447235000 | 2.266876000  |

|   |              |              |              |   |             |              |              |
|---|--------------|--------------|--------------|---|-------------|--------------|--------------|
| C | -2.377878000 | -2.795470000 | -0.313956000 | C | 3.422139000 | -0.035077000 | 4.224093000  |
| C | -1.291152000 | -3.681994000 | -0.588075000 | H | 4.433528000 | 1.729900000  | 3.466968000  |
| C | 0.077960000  | -3.351158000 | -0.559696000 | H | 2.335732000 | -1.860008000 | 4.640669000  |
| C | 1.132046000  | -4.233717000 | -1.011062000 | H | 3.554714000 | 0.228248000  | 5.270891000  |
| H | 0.984982000  | -5.218592000 | -1.428224000 | C | 4.501654000 | -1.572576000 | -0.271448000 |
| C | 2.332339000  | -3.566261000 | -0.849395000 | C | 5.014014000 | -2.723496000 | 0.373440000  |
| H | 3.315296000  | -3.921797000 | -1.112104000 | C | 5.407375000 | -0.772410000 | -0.999082000 |
| C | 2.025760000  | -2.277301000 | -0.283551000 | C | 6.364399000 | -3.086262000 | 0.257418000  |
| C | 3.024339000  | -1.138329000 | -0.002160000 | H | 4.361274000 | -3.326123000 | 0.998684000  |
| C | -5.090929000 | 0.819116000  | 0.955935000  | C | 6.765209000 | -1.128684000 | -1.114533000 |
| C | -6.187772000 | 0.868311000  | 0.068700000  | H | 5.068088000 | 0.141913000  | -1.473720000 |
| H | -6.032689000 | 0.669543000  | -0.989114000 | C | 7.251954000 | -2.292055000 | -0.495252000 |
| C | -5.299068000 | 1.085827000  | 2.327351000  | H | 6.726242000 | -3.977105000 | 0.765721000  |
| H | -4.457135000 | 1.037591000  | 3.013375000  | H | 7.438656000 | -0.490320000 | -1.682187000 |
| C | -7.473390000 | 1.188564000  | 0.543556000  | H | 8.300330000 | -2.567150000 | -0.582702000 |
| H | -8.309004000 | 1.233513000  | -0.150917000 |   |             |              |              |
| C | -6.586961000 | 1.396387000  | 2.802239000  |   |             |              |              |
| H | -6.735958000 | 1.594381000  | 3.860898000  |   |             |              |              |
| C | -7.677353000 | 1.451077000  | 1.912425000  |   |             |              |              |
| C | -1.656125000 | -5.094523000 | -0.939404000 |   |             |              |              |
| C | -2.458809000 | -5.369672000 | -2.070945000 |   |             |              |              |
| H | -2.796488000 | -4.549415000 | -2.698917000 |   |             |              |              |
| C | -1.216643000 | -6.172867000 | -0.136947000 |   |             |              |              |
| H | -0.614631000 | -5.970507000 | 0.744916000  |   |             |              |              |
| C | -2.800004000 | -6.693278000 | -2.401078000 |   |             |              |              |
| H | -3.404520000 | -6.889241000 | -3.283310000 |   |             |              |              |
| C | -1.574471000 | -7.495016000 | -0.456390000 |   |             |              |              |
| H | -1.239578000 | -8.311400000 | 0.178753000  |   |             |              |              |
| C | -2.363107000 | -7.760899000 | -1.592469000 |   |             |              |              |
| H | -8.671346000 | 1.694862000  | 2.279881000  |   |             |              |              |
| H | -2.634390000 | -8.783591000 | -1.843113000 |   |             |              |              |
| C | 1.260594000  | 3.839338000  | 0.226225000  |   |             |              |              |

**Table S28.** Xyz-Coordinates of optimized geometry of anti conformer of Zn(II) m-BPDM, R''=Ph.

|    |              |              |              |   |              |              |              |
|----|--------------|--------------|--------------|---|--------------|--------------|--------------|
| Zn | -0.582511000 | 0.345292000  | -0.676091000 | C | 5.362849000  | -0.445397000 | -0.471363000 |
| Cl | -0.732059000 | 0.484456000  | -3.027733000 | C | 4.281223000  | 0.352880000  | 1.543680000  |
| N  | -1.696160000 | -1.412192000 | -0.144133000 | C | 6.394350000  | -1.005863000 | 0.296989000  |
| N  | -2.122852000 | 1.428100000  | 0.094910000  | H | 5.383530000  | -0.561781000 | -1.551608000 |
| N  | 0.851862000  | 1.687635000  | 0.109810000  | C | 5.313504000  | -0.210895000 | 2.319189000  |
| C  | 1.147348000  | -2.955767000 | -1.938949000 | H | 3.466075000  | 0.862134000  | 2.048615000  |
| H  | 0.620657000  | -3.854319000 | -2.245656000 | C | 6.378145000  | -0.888789000 | 1.701859000  |
| C  | 1.939029000  | -2.265116000 | -2.865294000 | H | 7.205139000  | -1.536831000 | -0.196592000 |
| H  | 2.036928000  | -2.645604000 | -3.878599000 | H | 5.278684000  | -0.120066000 | 3.402484000  |
| C  | 2.574322000  | -1.061762000 | -2.514323000 | H | 7.175769000  | -1.323442000 | 2.299735000  |
| H  | 3.158931000  | -0.532013000 | -3.257633000 | C | 3.603464000  | 1.662358000  | -1.939340000 |
| C  | 2.407173000  | -0.526333000 | -1.225858000 | C | 4.882532000  | 2.257585000  | -1.963164000 |
| C  | 1.645964000  | -1.256861000 | -0.286654000 | C | 2.683271000  | 2.003129000  | -2.959826000 |
| H  | 1.582782000  | -0.893636000 | 0.733152000  | C | 5.247469000  | 3.144730000  | -2.993627000 |
| C  | 1.018259000  | -2.470841000 | -0.619214000 | H | 5.603381000  | 2.036341000  | -1.182649000 |
| C  | 3.119670000  | 0.763915000  | -0.752735000 | C | 3.047713000  | 2.887530000  | -3.987815000 |
| C  | 2.203403000  | 1.727290000  | 0.022783000  | H | 1.677041000  | 1.589139000  | -2.958121000 |
| C  | 2.722452000  | 2.940724000  | 0.625613000  | C | 4.333798000  | 3.462353000  | -4.014374000 |
| H  | 3.765524000  | 3.218009000  | 0.661332000  | H | 6.241235000  | 3.587231000  | -2.992583000 |
| C  | 1.642893000  | 3.663756000  | 1.075389000  | H | 2.322221000  | 3.128836000  | -4.760748000 |
| H  | 1.656105000  | 4.633833000  | 1.548964000  | H | 4.614272000  | 4.148883000  | -4.809948000 |
| C  | 0.444085000  | 2.902705000  | 0.762073000  | C | 0.316122000  | -2.697877000 | 1.854202000  |
| C  | -0.859915000 | 3.355972000  | 1.003027000  | C | 1.585108000  | -2.974303000 | 2.417272000  |
| C  | -2.081155000 | 2.680826000  | 0.665000000  | C | -0.657091000 | -2.094271000 | 2.675427000  |
| C  | -3.432861000 | 3.145141000  | 0.890346000  | C | 1.873467000  | -2.656764000 | 3.752561000  |

|   |              |              |              |   |              |              |              |
|---|--------------|--------------|--------------|---|--------------|--------------|--------------|
| H | -3.712155000 | 4.082120000  | 1.348794000  | H | 2.352240000  | -3.445228000 | 1.808199000  |
| C | -4.283477000 | 2.150140000  | 0.422743000  | C | -0.373636000 | -1.781999000 | 4.020846000  |
| H | -5.363540000 | 2.145831000  | 0.445541000  | H | -1.632778000 | -1.847255000 | 2.274114000  |
| C | -3.445454000 | 1.073308000  | -0.055922000 | C | 0.889975000  | -2.060411000 | 4.567771000  |
| C | -3.880588000 | -0.222513000 | -0.510153000 | H | 2.858418000  | -2.879002000 | 4.156536000  |
| C | -3.060519000 | -1.359607000 | -0.563541000 | H | -1.143173000 | -1.318085000 | 4.633908000  |
| C | -3.472873000 | -2.706796000 | -0.911034000 | H | 1.106565000  | -1.819463000 | 5.605960000  |
| H | -4.432718000 | -2.982273000 | -1.321821000 | C | 0.186382000  | -4.707184000 | 0.431632000  |
| C | -2.414381000 | -3.549790000 | -0.620346000 | C | -0.776852000 | -5.457927000 | 1.147239000  |
| H | -2.377997000 | -4.619936000 | -0.749368000 | C | 1.312150000  | -5.392905000 | -0.070098000 |
| C | -1.342083000 | -2.719828000 | -0.113713000 | C | -0.644104000 | -6.844686000 | 1.316299000  |
| C | 0.048769000  | -3.155795000 | 0.381821000  | H | -1.624913000 | -4.951307000 | 1.600078000  |
| C | -1.014318000 | 4.687067000  | 1.686552000  | C | 1.452747000  | -6.783991000 | 0.100102000  |
| C | -1.525652000 | 5.798503000  | 0.980051000  | H | 2.093680000  | -4.849221000 | -0.589431000 |
| H | -1.790704000 | 5.690184000  | -0.068594000 | C | 0.472486000  | -7.520787000 | 0.786028000  |
| C | -0.664649000 | 4.840742000  | 3.046447000  | H | -1.402138000 | -7.393825000 | 1.870116000  |
| H | -0.281125000 | 3.986787000  | 3.599202000  | H | 2.331454000  | -7.285146000 | -0.299577000 |
| C | -1.673058000 | 7.043154000  | 1.619177000  |   |              |              |              |
| H | -2.055654000 | 7.893286000  | 1.059647000  |   |              |              |              |
| C | -0.825392000 | 6.082195000  | 3.689244000  |   |              |              |              |
| H | -0.559684000 | 6.183927000  | 4.738723000  |   |              |              |              |
| C | -1.326870000 | 7.188628000  | 2.976908000  |   |              |              |              |
| C | -5.326664000 | -0.347890000 | -0.874197000 |   |              |              |              |
| C | -5.858930000 | 0.475860000  | -1.894858000 |   |              |              |              |
| H | -5.204391000 | 1.171695000  | -2.412721000 |   |              |              |              |
| C | -6.185051000 | -1.257325000 | -0.213410000 |   |              |              |              |
| H | -5.794322000 | -1.872625000 | 0.592604000  |   |              |              |              |
| C | -7.211932000 | 0.373536000  | -2.261455000 |   |              |              |              |
| H | -7.601327000 | 0.999260000  | -3.060625000 |   |              |              |              |
| C | -7.543119000 | -1.345273000 | -0.568470000 |   |              |              |              |
| H | -8.193414000 | -2.040202000 | -0.042701000 |   |              |              |              |
| C | -8.059960000 | -0.535150000 | -1.597925000 |   |              |              |              |
| H | -1.446182000 | 8.149430000  | 3.471858000  |   |              |              |              |
| H | -9.108386000 | -0.608348000 | -1.877012000 |   |              |              |              |
| C | 4.294446000  | 0.254697000  | 0.137608000  |   |              |              |              |

**Table S29.** Xyz-Coordinates of optimized geometry of syn conformer of Cd(II) m-BPDM, R"=Ph.

|    |              |              |              |   |              |              |              |
|----|--------------|--------------|--------------|---|--------------|--------------|--------------|
| Cd | -0.184604000 | 0.524512000  | 0.499141000  | C | 3.064657000  | -2.577541000 | 1.547753000  |
| Cl | -0.305916000 | 0.284299000  | 2.989164000  | C | 3.565253000  | -0.328706000 | 2.286260000  |
| N  | 1.779491000  | 1.383830000  | -0.250442000 | C | 3.170149000  | -3.039576000 | 2.869178000  |
| N  | -1.099942000 | 2.430672000  | -0.230536000 | H | 2.823073000  | -3.287510000 | 0.761858000  |
| N  | -2.130735000 | -0.449159000 | -0.214985000 | C | 3.674200000  | -0.787833000 | 3.610506000  |
| C  | -0.045696000 | -2.544419000 | -2.608072000 | H | 3.707770000  | 0.728911000  | 2.091188000  |
| H  | -0.809911000 | -3.004675000 | -3.218869000 | C | 3.479745000  | -2.146183000 | 3.910951000  |
| C  | 1.133496000  | -2.100139000 | -3.224468000 | H | 2.997076000  | -4.091392000 | 3.082543000  |
| H  | 1.247961000  | -2.206414000 | -4.300693000 | H | 3.890266000  | -0.078376000 | 4.405253000  |
| C  | 2.170383000  | -1.535482000 | -2.473664000 | H | 3.549500000  | -2.499554000 | 4.936846000  |
| H  | 3.071484000  | -1.230469000 | -2.986726000 | C | 4.604597000  | -1.046933000 | -0.930373000 |
| C  | 2.061766000  | -1.410162000 | -1.071961000 | C | 5.457055000  | -2.064185000 | -0.448548000 |
| C  | 3.222406000  | -0.726850000 | -0.251300000 | C | 5.029571000  | -0.341026000 | -2.084407000 |
| C  | 2.999742000  | 0.804327000  | -0.274931000 | C | 6.673119000  | -2.368268000 | -1.090296000 |
| C  | 4.038240000  | 1.818069000  | -0.270616000 | H | 5.194403000  | -2.616777000 | 0.444663000  |
| H  | 5.100508000  | 1.628555000  | -0.270366000 | C | 6.241869000  | -0.638651000 | -2.727672000 |
| C  | 3.406214000  | 3.045579000  | -0.284250000 | H | 4.419743000  | 0.464805000  | -2.482765000 |
| H  | 3.871892000  | 4.019634000  | -0.308172000 | C | 7.074745000  | -1.660801000 | -2.235729000 |
| C  | 1.973806000  | 2.798494000  | -0.275442000 | H | 7.305662000  | -3.155103000 | -0.685622000 |
| C  | 0.988737000  | 3.798868000  | -0.340041000 | H | 6.532932000  | -0.071064000 | -3.608675000 |
| C  | -0.439500000 | 3.638786000  | -0.358166000 | H | 8.015493000  | -1.893431000 | -2.728963000 |
| C  | -1.416912000 | 4.706056000  | -0.440366000 | C | -1.100172000 | -3.641812000 | 0.834204000  |
| H  | -1.196155000 | 5.758771000  | -0.535342000 | C | -0.136171000 | -4.678397000 | 0.788197000  |
| C  | -2.669163000 | 4.115953000  | -0.350756000 | C | -1.651121000 | -3.302262000 | 2.085083000  |
| H  | -3.628741000 | 4.611121000  | -0.363967000 | C | 0.235833000  | -5.376017000 | 1.947020000  |

|   |              |              |              |   |              |              |              |
|---|--------------|--------------|--------------|---|--------------|--------------|--------------|
| C | -2.454148000 | 2.689417000  | -0.218567000 | H | 0.329769000  | -4.933233000 | -0.160957000 |
| C | -3.480565000 | 1.692170000  | -0.038918000 | C | -1.273882000 | -3.994898000 | 3.252240000  |
| C | -3.334334000 | 0.301283000  | -0.008981000 | H | -2.355139000 | -2.482281000 | 2.172585000  |
| C | -4.424744000 | -0.649329000 | 0.167128000  | C | -0.339972000 | -5.041577000 | 3.189609000  |
| H | -5.458493000 | -0.386730000 | 0.337326000  | H | 0.971155000  | -6.175297000 | 1.881834000  |
| C | -3.890081000 | -1.913485000 | 0.056419000  | H | -1.699412000 | -3.697287000 | 4.206925000  |
| H | -4.409564000 | -2.858704000 | 0.112570000  | H | -0.051002000 | -5.575735000 | 4.091777000  |
| C | -2.465930000 | -1.751839000 | -0.203513000 | C | -2.332389000 | -3.896217000 | -1.414165000 |
| C | -1.507589000 | -2.928816000 | -0.488878000 | C | -2.459567000 | -5.280362000 | -1.177605000 |
| C | -0.206053000 | -2.432971000 | -1.214417000 | C | -3.026521000 | -3.357873000 | -2.527882000 |
| C | 0.860810000  | -1.862919000 | -0.466341000 | C | -3.227414000 | -6.099622000 | -2.030458000 |
| C | 1.479720000  | 5.222709000  | -0.385155000 | H | -1.981368000 | -5.734111000 | -0.318663000 |
| C | 2.006081000  | 5.831626000  | 0.775132000  | C | -3.790801000 | -4.168292000 | -3.380687000 |
| H | 2.052969000  | 5.265464000  | 1.701962000  | H | -2.985166000 | -2.288823000 | -2.720846000 |
| C | 2.451418000  | 7.166236000  | 0.739933000  | C | -3.892816000 | -5.552742000 | -3.139738000 |
| H | 2.846884000  | 7.625277000  | 1.642775000  | H | -3.307139000 | -7.162996000 | -1.816372000 |
| C | 2.385089000  | 7.904297000  | -0.457629000 | H | -4.309806000 | -3.719450000 | -4.224438000 |
| H | 2.732817000  | 8.934186000  | -0.485377000 | H | -4.486657000 | -6.185056000 | -3.795436000 |
| C | 1.864286000  | 7.300617000  | -1.618861000 |   |              |              |              |
| H | 1.812265000  | 7.861594000  | -2.548925000 |   |              |              |              |
| C | 1.407743000  | 5.969967000  | -1.580988000 |   |              |              |              |
| H | 1.006105000  | 5.506877000  | -2.478918000 |   |              |              |              |
| C | -4.876517000 | 2.227735000  | 0.152606000  |   |              |              |              |
| C | -5.640710000 | 2.665698000  | -0.950045000 |   |              |              |              |
| H | -5.221570000 | 2.604985000  | -1.951552000 |   |              |              |              |
| C | -6.941883000 | 3.168140000  | -0.759963000 |   |              |              |              |
| H | -7.523849000 | 3.495517000  | -1.618263000 |   |              |              |              |
| C | -7.488436000 | 3.246265000  | 0.535856000  |   |              |              |              |
| H | -8.492481000 | 3.636921000  | 0.683146000  |   |              |              |              |
| C | -6.727086000 | 2.815328000  | 1.639644000  |   |              |              |              |
| H | -7.139780000 | 2.874357000  | 2.643850000  |   |              |              |              |
| C | -5.428817000 | 2.306002000  | 1.449479000  |   |              |              |              |
| H | -4.839878000 | 1.976959000  | 2.302045000  |   |              |              |              |
| H | 0.792743000  | -1.876674000 | 0.620014000  |   |              |              |              |
| C | 3.255510000  | -1.212417000 | 1.231304000  |   |              |              |              |

**Table S30.** Xyz-Coordinates of optimized geometry of anti conformer of Cd(II) m-BPDM, R''=Ph.

|    |              |              |              |   |              |              |              |
|----|--------------|--------------|--------------|---|--------------|--------------|--------------|
| Cd | 0.407086000  | 0.440075000  | -0.965765000 | C | -0.993322000 | -3.462135000 | 2.232529000  |
| Cl | 0.223856000  | 0.611505000  | -3.454813000 | C | 1.273749000  | -2.815926000 | 2.780036000  |
| N  | 1.985924000  | -1.036071000 | -0.143598000 | C | -1.328059000 | -3.466960000 | 3.596788000  |
| N  | 1.752426000  | 1.966188000  | -0.008643000 | H | -1.759726000 | -3.708574000 | 1.503117000  |
| N  | -1.270653000 | 1.615747000  | 0.111786000  | C | 0.943690000  | -2.821899000 | 4.148522000  |
| C  | -2.686386000 | -1.654853000 | -2.118611000 | H | 2.286602000  | -2.557773000 | 2.489321000  |
| H  | -3.513999000 | -1.296111000 | -2.718120000 | C | -0.358482000 | -3.148067000 | 4.566554000  |
| C  | -1.936914000 | -2.746814000 | -2.569324000 | H | -2.343496000 | -3.715296000 | 3.895744000  |
| H  | -2.189995000 | -3.218434000 | -3.515160000 | H | 1.704824000  | -2.568734000 | 4.883073000  |
| C  | -0.861568000 | -3.240920000 | -1.817706000 | H | -0.614152000 | -3.150118000 | 5.623561000  |
| H  | -0.324063000 | -4.102228000 | -2.188796000 | C | 0.976162000  | -4.690014000 | -0.120304000 |
| C  | -0.510596000 | -2.649080000 | -0.587316000 | C | 0.550306000  | -5.784973000 | 0.660252000  |
| C  | 0.675671000  | -3.204462000 | 0.276985000  | C | 1.676199000  | -4.974884000 | -1.319423000 |
| C  | 1.959240000  | -2.374188000 | 0.044384000  | C | 0.809721000  | -7.111370000 | 0.261301000  |
| C  | 3.308634000  | -2.903181000 | 0.126244000  | H | 0.026538000  | -5.618646000 | 1.593809000  |
| H  | 3.568434000  | -3.938135000 | 0.285390000  | C | 1.937265000  | -6.294166000 | -1.721877000 |
| C  | 4.171824000  | -1.840609000 | -0.047784000 | H | 2.030646000  | -4.159000000 | -1.943882000 |
| H  | 5.250862000  | -1.870920000 | -0.059605000 | C | 1.502481000  | -7.376197000 | -0.931823000 |
| C  | 3.360672000  | -0.642145000 | -0.176857000 | H | 0.471782000  | -7.932392000 | 0.889539000  |
| C  | 3.872449000  | 0.666343000  | -0.198467000 | H | 2.477787000  | -6.474090000 | -2.648192000 |
| C  | 3.130969000  | 1.888630000  | -0.058928000 | H | 1.704215000  | -8.399726000 | -1.238598000 |
| C  | 3.694756000  | 3.191580000  | 0.230307000  | C | -4.112898000 | -0.650889000 | 0.795706000  |
| H  | 4.747686000  | 3.428346000  | 0.272217000  | C | -5.011803000 | -1.679909000 | 0.426888000  |
| C  | 2.629166000  | 4.041142000  | 0.490369000  | C | -3.921726000 | -0.397209000 | 2.169047000  |
| H  | 2.675591000  | 5.081828000  | 0.775084000  | C | -5.712808000 | -2.412847000 | 1.396523000  |

|   |              |              |              |   |              |              |              |
|---|--------------|--------------|--------------|---|--------------|--------------|--------------|
| C | 1.420025000  | 3.256580000  | 0.342756000  | H | -5.157655000 | -1.916711000 | -0.623531000 |
| C | 0.083728000  | 3.702118000  | 0.642216000  | C | -4.621605000 | -1.132513000 | 3.146143000  |
| C | -1.097591000 | 2.955325000  | 0.595416000  | H | -3.223887000 | 0.369809000  | 2.490483000  |
| C | -2.400279000 | 3.440764000  | 1.035661000  | C | -5.524478000 | -2.140131000 | 2.767049000  |
| H | -2.594267000 | 4.424735000  | 1.435631000  | H | -6.400419000 | -3.196041000 | 1.085642000  |
| C | -3.306292000 | 2.425832000  | 0.840299000  | H | -4.455456000 | -0.915628000 | 4.198849000  |
| H | -4.368184000 | 2.439044000  | 1.036834000  | H | -6.067967000 | -2.705678000 | 3.520359000  |
| C | -2.575631000 | 1.314213000  | 0.246783000  | C | -4.200109000 | 0.723890000  | -1.415084000 |
| C | -3.293227000 | 0.076658000  | -0.312692000 | C | -5.585504000 | 0.919197000  | -1.241493000 |
| C | -2.363702000 | -1.024342000 | -0.900674000 | C | -3.585410000 | 1.252211000  | -2.576855000 |
| C | -1.275279000 | -1.534963000 | -0.148871000 | C | -6.345802000 | 1.599979000  | -2.212367000 |
| C | 5.366901000  | 0.829970000  | -0.280194000 | H | -6.082891000 | 0.546495000  | -0.351916000 |
| C | 6.206284000  | 0.502309000  | 0.806998000  | C | -4.342694000 | 1.930155000  | -3.544475000 |
| H | 5.768067000  | 0.121918000  | 1.726295000  | H | -2.514810000 | 1.140022000  | -2.735719000 |
| C | 7.598635000  | 0.684450000  | 0.713709000  | C | -5.730170000 | 2.106613000  | -3.370207000 |
| H | 8.232468000  | 0.435251000  | 1.561413000  | H | -7.414047000 | 1.735239000  | -2.058028000 |
| C | 8.169125000  | 1.188566000  | -0.471080000 | H | -3.846152000 | 2.321314000  | -4.428900000 |
| H | 9.245369000  | 1.324871000  | -0.545009000 | H | -6.316276000 | 2.633780000  | -4.119418000 |
| C | 7.336749000  | 1.518962000  | -1.558327000 |   |              |              |              |
| H | 7.767937000  | 1.908322000  | -2.477313000 |   |              |              |              |
| C | 5.943377000  | 1.349777000  | -1.460603000 |   |              |              |              |
| H | 5.302533000  | 1.608200000  | -2.299830000 |   |              |              |              |
| C | -0.027990000 | 5.132961000  | 1.103055000  |   |              |              |              |
| C | 0.058208000  | 6.184653000  | 0.164925000  |   |              |              |              |
| H | 0.190540000  | 5.952707000  | -0.888921000 |   |              |              |              |
| C | -0.038527000 | 7.524135000  | 0.585678000  |   |              |              |              |
| H | 0.019908000  | 8.324186000  | -0.148299000 |   |              |              |              |
| C | -0.209919000 | 7.828000000  | 1.950396000  |   |              |              |              |
| H | -0.280806000 | 8.863208000  | 2.275476000  |   |              |              |              |
| C | -0.287616000 | 6.783022000  | 2.891291000  |   |              |              |              |
| H | -0.415196000 | 7.008194000  | 3.947456000  |   |              |              |              |
| C | -0.200228000 | 5.442990000  | 2.469360000  |   |              |              |              |
| H | -0.255299000 | 4.637888000  | 3.198007000  |   |              |              |              |
| H | -1.079273000 | -1.118206000 | 0.835536000  |   |              |              |              |
| C | 0.311739000  | -3.132570000 | 1.796860000  |   |              |              |              |
